# Supplementary material for: Guidelines for the Antibiotic Use in Adults with Acute Upper Respiratory Tract Infections
Source: PubMed Central journal article supplement — Infect Chemother. 2017 Dec 26;49(4):326–52. doi: 10.3947/ic.2017.49.4.326 (PMC5754344; doi:10.3947/ic.2017.49.4.326), 2017-12-26
Supplement: ic-49-326-s001.pdf [file ic-49-326-s001.pdf]

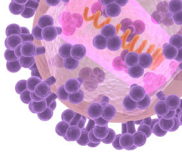

## 성인 급성 상기도 감염 항생제 사용지침 권고안

윤영경<sup>1,2</sup>, 박찬순<sup>3,4</sup>, 김재욱<sup>3,5</sup>, 황규린<sup>3,5</sup>, 이세영<sup>3,6</sup>, 김태훈<sup>3,7</sup>, 박도양<sup>3,8</sup>, 김현준<sup>3,8</sup>, 김동영<sup>3,9</sup>, 이현종<sup>10</sup>, 신현영<sup>11,12</sup>, 유용규<sup>13,14</sup>, 박동아<sup>15</sup>, 김신우<sup>1,16,17</sup>

<sup>1</sup>대한감염학회, <sup>2</sup>고려의대 내과, <sup>3</sup>대한이비인후과학회, <sup>4</sup>가톨릭의대 이비인후과, <sup>5</sup>순천향의대 이비인후과, <sup>6</sup>중앙의대 이비인후과, <sup>7</sup>고려의대 이비인후과, <sup>8</sup>아주의대 이비인후과, <sup>9</sup>서울의대 이비인후과, <sup>10</sup>대한이비인후과의사회, <sup>11</sup>대한가정의학과 의사회, <sup>12</sup>서남의대 가정의학과, <sup>13</sup>대한개원의협의회, <sup>14</sup>남문내과의원, <sup>15</sup>한국보건연구의료원, <sup>16</sup>대한화학요법학회, <sup>17</sup>경북의대 내과

This guideline was developed as part of the 2016 Policy Research Servicing Project by the Korea Centers for Disease Control and Prevention. A multidisciplinary approach was taken to formulate this guideline to provide practical information about the diagnosis and treatment of adults with acute upper respiratory tract infection, with the ultimate aim to promote the appropriate use of antibiotics. The formulation of this guideline was based on a systematic literature review and analysis of the latest research findings to facilitate evidence-based practice, and focused on key questions to help clinicians obtain solutions to clinical questions that may arise during the care of a patient. This guideline mainly covers the subjects on the assessment of antibiotic indications and appropriate selection of antibiotics for adult patients with acute pharyngotonsillitis or acute sinusitis.

**Key Words:** Guideline; Antibiotics; Pharyngitis; Tonsillitis; Rhinosinusitis

### 지침의 사용 안내

본 권고안은 19세 이상 성인의 급성 상기도 감염의 항생제 사용에 대한 기본적인 원칙을 2017년 3월 현재 국내 실정을 고려하여 제시하는 것입니다. 본 진료 지침은 모든 성인 환자에 대해서 일률적으로 적용하기 위한 목적보다 각 환자의 여러 상황을 고려하여 직접 환자를 진료하는 의사에게 참고 자료로 제공되는 것입니다. 그러므로 진료 지침이 임상 의사의 최종적 판단에 대한 적정성 기준으로 활용될 수 없습니다. 또한, 본 진료 지침이 개인적인 진료 및 교육 목적으로 활용될 수 있지만, 상업적 목적이나 진료 심사 목적 등으로 사용될 수 없습니다. 진료 및 교육 이외의 목적으로 사용하고자 하는 경우에는 제정위원회에 서면 요구서를 제출하여 서면 동의를 얻어야 합니다.

### I. 머리말

#### 1. 배경 및 목적

급성 상기도 감염은 일반 성인들이 매년 2-5회 경험하는 가장 흔한 질환이다 [1]. 미국 자료에 따르면 성인 근로자 결근 사유의 40%를 차지하고, 외래 및 응급실을 내원하는 환자의 10%를 차지하는, 질병 부담이 높은 질환이다 [2, 3]. 급성 상기도 감염은 코, 부비강, 인두, 중이, 후두 및 후두개, 기도 및 기관지부위에 발생하는 급성 감염을 의미하며, 일반 감기가 가장 흔하나, 현저한 증상에 근거하여 주로 침범되는 해부학적 위치에 따라 임상적으로 진단한다. 즉, 인후통을 주증상으로 하는 인두염 (pharyngitis) 및 편도염 (tonsillitis), 쇠 목소리를 보이는 후두염 (laryngitis) 혹은 후두개염 (epiglottitis), 부비동관련 증상을 호소하는 비부비동염 (rhinosinusitis) 등으로 분류한다 [4]. 경우에 따라서는 중이염 (otitis media), 기관염 (tracheitis) 및 기관지염 (bronchitis)도 급성 상기도 감염으로 구분된다.

Received: November 16, 2017 Published online: December 26, 2017

교신저자: 김신우

41944 대구 중구 동덕로 130, 경북대학교 병원 내과학교실 감염내과

Tel: +82-53-200-6525, Fax: +82-53-426-2046

E-mail: ksw2kms@knu.ac.kr

다양한 바이러스에 의하여 미열, 콧물, 코막힘, 재채기, 인후통, 기침, 근육통 등의 증상으로 나타나서 자연 치유되는 감기는 경우에 따라 대증요법이 요구되며, 항생제 사용은 필요하지 않다 [1-3]. 특히, 감기에서 항생제 사용이 세균성 감염 합병증의 발생을 줄이지 못할 뿐 아니라, 부작용 및 항생제 내성을 일으켜 의료 비용을 증가시키는 것은 잘 알려져 있다 [1-3]. 감기에서 항생제 사용을 지양하는 것은 중요한 국가보건문제로 항생제 오남용 차원에서 강조되는 측면 이외에도 의료기관의 질평가 지표로 사용되고 있다.

성인에서 급성 상기도 감염 중 편도염의 5~15%는 *Streptococcus pyogenes* (A군 용혈성 사슬알균, Group A beta-haemolytic streptococci, GABHS) 등의 세균에 의해 발생되며 [5, 6], 호흡기 바이러스 감염 이후에 0.5~2%는 세균성 급성 비부비동염의 중복 감염이 있을 수 있고 [7], 급성 기관지염의 10% 정도는 *Bordetella pertussis*, *Mycoplasma pneumoniae*, *Chlamydia pneumoniae* 등의 세균에 의해 발생할 수 있다. 따라서, 급성 상기도 감염의 일부는 적절한 항생제 사용이 요구되는 경우가 드물지 않다.

하지만, 상기도 감염성 질환에 대한 연구는 무작위 대조군 연구 결과가 드물고 연구 결과가 논란의 소지가 많은 경우가 흔하여, 단일화된 진료 지침을 바탕으로 근거 중심의 진료를 시행하는 것이 쉽지 않다. 외국의 경우 근거중심의학을 기반으로 하는 진료 지침들 역시 다양한 견해 차이를 보인다 [8].

이에 대한화학요법학회, 대한감염학회, 대한이비인후과학회, 대한이비인후과의사회, 대한가정의학과과의사회, 대한개원의협의회, 한국보건의료연구원에서는 국내 성인의 상기도 감염 항생제 사용 지침의 가이드라인을 제정하였다. 이 가이드라인은 상기도 감염을 진료하는 일차 의료기관의 의사를 대상으로 진료 시 항생제의 올바른 사용을 위해 제정되었다.

## 2. 범위

본 진료 지침에서는 2017년 3월 현재 국내 실정을 고려하여 성인에서 상기도 감염 의심 환자에 대한 항생제 사용의 기본 원칙을 제시한다. 특히, 항생제 사용이 요구되는 세균성 인두편도염 및 세균성 부비동염을 중심으로 기술하였다. 추후 국내 상황의 변화에 따라 주기적으로 수정이 이루어질 예정이다.

## 3. 임상진료지침 개발위원회 구성

2017년 1월 성인에서의 상기도 감염에 대한 항생제 치료지침을 위한 개발위원회를 구성하였다. 근거 중심 및 다학제 접근을 기반으로 하는 임상 진료 지침 개발을 위해, 대한화학요법학회, 대한감염학회, 대한이비인후과학회, 대한이비인후과의사회, 대한가정의학과과의사회, 대한개원의협의회 및 한국보건의료연구원에서 추천된 전문가 12명이 참여하였다.

## 4. 문헌 검색 방법

본 임상 진료 지침 제정을 위한 체계적인 국외 문헌 검색은 PubMed (www.pubmed.gov)와 EMBASE (www.embase.com)을 이용하였고, 국내 문헌 검색은 한국의학논문데이터베이스 (KMBase, kmbase.medic.or.kr)와 KoreaMed (www.koreamed.org)를 활용하였다. 문헌 검색은 2017년 3월 14일에 문헌 검색 전문가가 체계적인 문헌 검색을 수행하였으며, 2006년 1월 1일부터 2017 3월 14일까지 발표된 자료를 대상으로 하였다. 그 밖에 전세계 진료 지침을 검토하고, 관련 참고 문헌도 조사 및 활용하였다. 일차 선별한 참고 문헌 총 2,117개 중 403개를 검

표 1. 권유의 강도 및 권유의 수준 (GRADE 체계)

| 근거수준의 평가 |         |                                                                                           |                                                   |                                          | 권고의 강도                                                            |
|----------|---------|-------------------------------------------------------------------------------------------|---------------------------------------------------|------------------------------------------|-------------------------------------------------------------------|
| 연구 설계    | 초기 근거수준 | 등급 낮춤                                                                                     | 등급 높임                                             | 근거수준                                     |                                                                   |
| 무작위 연구   | 높음 →    | 빼돌림 위험<br>심각: -1<br>매우 심각: -2<br><br>비일관성<br>심각: -1<br>매우 심각: -2                          | 효과크기<br>큼: +1<br>매우 큼: +2<br><br>양-반응관계<br>있음: +1 | 높음: 4점<br>중등도: 3점<br>낮음: 2점<br>매우 낮음: 1점 | 강함 (strong): 명확히 위해 (harm)보다 이득 (benefit)이 더 클 것으로 혹은 작을 것으로 생각됨. |
| 관찰 연구    | 낮음 →    | 비직접성<br>심각: -1<br>매우 심각: -2<br><br>비정밀성<br>심각: -1<br>매우 심각: -2<br><br>출판비뚤림<br>강하게 의심: -1 | 교란변수<br>효과추정의 확신도를 높임: +1                         |                                          | 약함 (weak): 강함이 아닌 모든 경우                                           |

토하였고, 본 임상 진료 지침에 총 156개의 참고 문헌을 인용하였다 (부록).

### 5. 핵심 질문 (key question) 설정 및 합의 도출 과정

본 임상 진료 지침은 임상 의사가 급성 인두편도염과 부비동염 환자 진료에서 생기는 임상 질문들에 대한 답을 찾을 수 있도록 핵심 질문을 중심으로 개발되었다. 따라서, 국내 상황을 고려하여, 총 10개 (급성 인두편도염 5개 및 급성 부비동염 5개)의 핵심 질문을 지침 개발위원회 회의를 통해 최종적으로 선정하였다. 공동의 합의를 찾기 위한 합의안 도출은 명목집단기법을 주로 사용하였다.

### 6. 권고 강도 및 근거 수준

근거 수준 및 권고의 강도는 GRADE (Grading of Recommendations Assessment, Development and Evaluation, <http://www.gradeworkinggroup.org>) 방법을 이용하여, 근거 수준은 높음 (high), 중등도 (moderate), 낮음 (low), 매우 낮음 (very low)로 분류하였고, 권고의 강도는 강함 (strong), 약함 (weak)으로 분류하여 표시하였다(표 1).

### 7. 외부 전문가 평가

지침 개발위원회의 내부 회의를 통하여 마련된 지침 권고안을 2017년 4월 대한화학요법학회에서 발표하고, 전문가 그룹의 평가의 견을 수렴하였으며, 논의된 내용은 추가적인 지침 개발위원회의 내부 회의를 통하여 수정 및 보완하였다. 추가적으로 기타 전문가 그룹의 의견을 수렴하였으며, 이를 바탕으로 지침을 완성하였다.

### 8. 용어 및 약어 정리

본 지침에서는 의학용어집 제 5판 (대한의사협회 발행, 2008년 11월 개정)을 기준으로 관련된 학술 용어들을 한글로 표기하였으며, 한글로 의미 전달이 명확하지 않을 경우 한글로 표시한 후 괄호 내에 영문 표기를 병기하였다. 병원체 이름, 고유명사, 약품명, 단위 등과 같이 한글로 표시할 수 없는 용어들은 영문으로 표기하였다.

1차 치료는 첫 번째 항생제 치료를 의미한다. 2차 치료는 첫 번째 항생제 투약 후 치료 실패로 판단하여 항생제를 변경하는 경우를 의미한다.

## II. 권고요약

| 권고사항                                                                                                                                                                                                                                | 권고강도 | 근거수준 |
|-------------------------------------------------------------------------------------------------------------------------------------------------------------------------------------------------------------------------------------|------|------|
| <b>KQ 1.</b> 급성 인두편도염을 시사하는 증상과 징후가 있을 때 항생제를 투여하여야 하는가?                                                                                                                                                                            |      |      |
| 1-1. 급성 인두편도염 환자에서 합병증이 있는 경우에 항생제 치료를 권고한다.                                                                                                                                                                                        | 강함   | 높음   |
| 1-2. 급성 인두편도염 임상 증상의 중증도에 따라 변형된 Centor 점수 (McIsaac 점수)가 3점 이상인 경우, 신속항원 검출검사를 시행하여 양성이면 항생제 치료를 권고한다. 신속항원 검출검사를 시행할 수 없는 경우에는 변형된 Centor 점수 (McIsaac 점수)에 따라 항생제 치료를 할 수 있다. 세균성 급성 인두편도염에서 항생제 치료는 증상을 조기에 호전시키고, 합병증을 예방할 수 있다. | 강함   | 높음   |
| <b>KQ 2.</b> 세균성 인두편도염 환자에서 초기 경험적 항생제는 어떤 것을 사용하여야 하는가?                                                                                                                                                                            |      |      |
| 2-1. Amoxicillin 10일 요법을 사용할 수 있다 (단, 전염단핵구증이 의심될 때는 amoxicillin을 사용하지 않는다).                                                                                                                                                        | 강함   | 높음   |
| 2-2. 환자 순응도가 좋지 않거나 환자의 상황 상 10일 항생제 요법이 어려울 경우 cefdinir, azithromycin 5일 요법을 사용할 수 있다.                                                                                                                                             | 강함   | 중등도  |
| 2-3. 주사요법으로서 benzathine penicillin G를 1회 단일요법으로 근주 할 수 있다 (성인: 1,200,000 Unit 1회 IM). 그러나 국내에서는 1차적으로 사용을 권하지는 않는다.                                                                                                                 | 강함   | 높음   |
| 2-4. Penicillin 알레르기가 있는 경우: 4형 (발진 등) 알레르기 경우 1세대 cephalosporin (cephalexin, cefadroxil) 10일 요법 또는 clindamycin 또는 clarithromycin 10일요법, azithromycin 5일요법 또는 cefdinir, cefpodoxime 5일요법을 할 수 있다.                                   | 강함   | 중등도  |
| 2-5. 1형 (anaphylaxis 등) 알레르기의 경우 모든 베타락탐 항생제 (cephalosporin 등)는 사용하지 않는다                                                                                                                                                            | 강함   | 중등도  |
| <b>KQ 3.</b> 급성 세균성 인두편도염에서 언제 2차 약제 투약이 필요한가?                                                                                                                                                                                      |      |      |
| 3-1. <i>S. pyogenes</i> 의 급성 인두편도염에서 1차 약제 치료 실패 시, ampicillin/sulbactam, amoxicillin/clavulanate, 좁은 항균 범위의 cephalosporins, clindamycin을 2차 치료제로 고려해볼 수 있다.                                                                        | 약함   | 중등도  |
| 3-2. 배양 검사에서 <i>S. pyogenes</i> 분리가 지속되거나 재발이 발생하면 2차 약제 투약을 고려할 수 있다.                                                                                                                                                              | 약함   | 중등도  |

| 권고사항                                                                                                                                                                                                                                                                                      | 권고강도 | 근거수준  |
|-------------------------------------------------------------------------------------------------------------------------------------------------------------------------------------------------------------------------------------------------------------------------------------------|------|-------|
| 3-3. 중이염, 편도 농양 등의 급성 화농성 합병증과 류마티스열, 급성 사구체신염의 비화농성 합병증이 동반되면 항생제 변경을 고려할 수 있다.                                                                                                                                                                                                          | 강함   | 중등도   |
| <b>KQ 4.</b> 반복되는 세균성 인두편도염 환자에 대한 항생제 치료 방법은 무엇인가?                                                                                                                                                                                                                                       |      |       |
| 4-1. 재발성 인두편도염에 대한 예방적 항생제 치료는 권장되지 않는다.                                                                                                                                                                                                                                                  | 약함   | 높음    |
| 4-2. 재발성 급성 인두편도염에 대해 1차 항생제로 다시 치료해 볼 수 있으며, 2차 항생제로는 좁은 항균 범위의 cephalosporin (cephradine, cefadroxil), clindamycin, amoxicillin/clavulanate 혹은 penicillin과 rifampin 병합 치료를 고려할 수 있다.                                                                                                    | 약함   | 높음    |
| <b>KQ 5.</b> 급성 세균성 인두편도염이 의심되는 진료 시 어떤 상황에서 중증으로의 진행이나 급성 화농성 합병증의 위험을 고려해 해당과 전문의에게 전원하여야 하는가?                                                                                                                                                                                          |      |       |
| 5-1. 증상이 매우 심하고 지속되며, 침을 삼키기 힘들어하고, 목소리가 변하는 (“hot potato” voice) 경우 및 기도의 막힘을 시사하는 다른 임상 증상 등이 있을 때 인두편도염의 급성 합병증을 고려하여야 하며 수술적 처치가 필요하지 판단하기 위해 해당과 전문의에게 전원하는 것이 필요하다.                                                                                                                 | 강함   | 매우 낮음 |
| <b>KQ 6.</b> 급성 부비동염의 증상 및 진찰소견을 보이는 환자에게 언제부터 경험적 항생제 처방을 시작해야 하는가?                                                                                                                                                                                                                      |      |       |
| 6-1. 급성 세균성 부비동염으로 진단된 경우 항생제를 진단 초기에 처방할 수 있다.                                                                                                                                                                                                                                           | 강함   | 높음    |
| 6-2. 급성 세균성 부비동염 진단 후 7일 이내 증상의 호전이 없거나 증상이 악화되는 경우 경험적 항생제 사용을 시작한다.                                                                                                                                                                                                                     | 강함   | 높음    |
| 6-3. 아래 중증의 증상 또는 진찰소견을 동반한 경우는 항생제 치료를 시작 한다: 39°C 이상의 고열이나 3-4일간 지속된 안면 통증 또는 농성 비루                                                                                                                                                                                                     | 강함   | 높음    |
| <b>KQ 7.</b> 급성 세균성 부비동염의 초기 경험적 항생제 사용시 1차 선택약으로 권고되는 항생제는 무엇인가?                                                                                                                                                                                                                         |      |       |
| 7-1. 성인의 급성 세균성 부비동염에서, amoxicillin 혹은 amoxicillin/clavulanate가 초기 경험적 항생제로 우선 권고되는 1차 선택약이다.                                                                                                                                                                                             | 강함   | 높음    |
| 7-2. Penicillin-resistant <i>S. pneumoniae</i> 의 발생률이 높은 지역, 심한 증상, 고령, 최근 입원력, 1개월 이내의 항생제 사용력, 면역 저하자의 경우, 고용량의 amoxicillin 혹은 amoxicillin/clavulanate 사용을 고려한다.                                                                                                                        | 강함   | 중등도   |
| 7-3. Penicillin 알레르기 환자의 경우: 4형 (발진 등) 알레르기 경우 사용시 doxycycline 혹은 fluoroquinolone, 3세대 cephalosporin, clindamycin의 투여를 고려할 수 있다. 1형 (anaphylaxis 등) 알레르기의 경우 모든 베타락탐 항생제 (cephalosporin 등)는 사용하지 않는다. 베타락탐 외의 항생제를 투여하여야 한다.                                                              | 강함   | 높음    |
| 7-4. 경험적 항생제 사용기간은 중증의 급성 부비동염이 아닌 경우, 5-10일 이내 또는 증상/징후 호전 후 4-7일의 짧은 사용을 고려한다.                                                                                                                                                                                                          | 강함   | 높음    |
| <b>KQ 8.</b> 급성 세균성 비부비동염 성인 중 1차 항생제 치료 실패 혹은 중증 세균성 비부비동염 시 2차 항생제는 언제 사용되어야 하는가?                                                                                                                                                                                                       |      |       |
| 8-1. 초기 경험적 항생제 치료에도 72시간내 증상이 더 악화되거나 3-5일 이후에도 상태호전이 없는 환자에 있어 2차 항생제 사용을 고려할 수 있다.                                                                                                                                                                                                     | 강함   | 중등도   |
| 8-2. 영상 검사, 미생물 배양 및 항생제 감수성 검사를 통해 환자를 재평가 한다. 경험적 항생제로 respiratory fluoroquinolone 사용을 권장한다.                                                                                                                                                                                            | 강함   | 매우 낮음 |
| 8-3. 원인균에 대한 미생물 배양 및 감수성 검사가 어려울 경우, 다약제 내성 (Multi-drug resistant) <i>S. pneumoniae</i> 나 beta-lactamase를 생산하는 <i>H. influenzae</i> , <i>M. catarrhalis</i> 를 치료할 수 있는 항생제 (high-dose amoxicillin/clavulanate, fluoroquinolone, doxycycline, clindamycin과 3세대 cephalosporin 병합요법)를 사용한다. | 강함   | 중등도   |
| 8-4. 입원치료를 받을 정도로 증세가 심할 경우 ampicillin/sulbactam, ceftriaxone, cefotaxime, levofloxacin, moxifloxacin 등의 약제를 사용할 수 있다.                                                                                                                                                                    | 강함   | 중등도   |
| 8-5. 국내에서 급성 세균성 비부동염 치료를 위한 2차 치료 항생제의 선택은 다음의 내용을 고려하여 결정되어야 한다: 국내의 급성 세균성 비부비동염의 원인균주 유병률, 국내의 항생제 내성균주의 유병률, 급성세균성 비부비동염의 대표적 원인균주 3가지에 대한 항균력 ( <i>S. pneumoniae</i> , <i>H. influenzae</i> , <i>M. catarrhalis</i> ), 개별항생제의 특성 (예, 용량, 약효지속시간 부작용 등)                              | 강함   | 매우 낮음 |

| 권고사항                                                                                                                        | 권고강도 | 근거수준  |
|-----------------------------------------------------------------------------------------------------------------------------|------|-------|
| <b>KQ 9.</b> 1차 혹은 2차의 초기 경험적 항생제 치료에도 72시간내 증상이 더 악화되거나 3-5일 이후에도 상태호전이 없는 환자에 있어, 권고되는 치료전략은 무엇인가?                        |      |       |
| 9-1. 적절한 1차 혹은 2차의 약물치료에도 호전을 보이지 않는 경우나 재발성 급성 부비동염의 경우, 알레르기 유무나 면역계통의 이상, 치아감염 등을 고려하여 추가 진단하는 것이 권고된다.                  | 강함   | 매우 낮음 |
| 9-2. 연관된 동반질환이 진단된 경우 동반질환을 각 질환의 지침에 맞게 치료한다. 알레르기 양성일 경우, 환자에 따라 환경요법, 면역치료, 약물치료 등을 고려한다.                                | 강함   | 매우 낮음 |
| 9-3. 재발성 급성 부비동염에서 적절한 약물치료 후 반응이 없을 경우, 수술적 치료를 고려할 수 있다.                                                                  | 감함   | 중등도   |
| <b>KQ 10.</b> 지역사회획득 폐렴에 이환되었을 가능성이 있는 성인에서 적정 항생제 치료 기간은 얼마인가?                                                             |      |       |
| 10-1. 적절한 치료에도 불구하고 증상의 호전이 나타나지 않거나, 반복적인 염증이 나타나는 경우에는 염증을 유발하는 원인 감별을 위해 비강내시경검사 및 영상 촬영 등 정밀 검사를 요하며 해당 전문의에게 의뢰하여야 한다. | 약함   | 매우 낮음 |
| 10-2. 급성 비부비동염의 안와 혹은 두개 내 합병증이 의심될 때에는 즉시 해당 전문의에게 의뢰하여야 한다.                                                               | 강함   | 매우 낮음 |

### III. 권고안

#### 1. 핵심 질문 별 권고 지침

- 1) 급성 인두편도염을 시사하는 증상과 징후가 있을 때 항생제를 투여하여야 하는가?

|                                                                                                                                                                                                                                                                                                                                                                                |
|--------------------------------------------------------------------------------------------------------------------------------------------------------------------------------------------------------------------------------------------------------------------------------------------------------------------------------------------------------------------------------|
| <ol style="list-style-type: none"> <li>1. 급성 인두편도염 환자에서 합병증이 있는 경우에 항생제 치료를 권고한다 (근거수준 높음, 권고강도 강함).</li> <li>2. 급성 인두편도염 임상 증상의 중증도에 따라 변형된 Centor 점수 (McIsaac 점수)가 3점 이상인 경우, 신속항원 검출 검사를 시행하여 양성이면 항생제 치료를 권고한다. 신속항원 검출검사를 시행할 수 없는 경우에는 변형된 Centor 점수 (McIsaac 점수)에 따라 항생제 치료를 할 수 있다. 세균성 급성 인두편도염에서 항생제 치료는 증상을 조기에 호전시키고, 합병증을 예방할 수 있다 (근거수준 높음, 권고강도 강함).</li> </ol> |
|--------------------------------------------------------------------------------------------------------------------------------------------------------------------------------------------------------------------------------------------------------------------------------------------------------------------------------------------------------------------------------|

급성 인두편도염의 대부분은 바이러스가 원인이다. 알려진 호흡기 바이러스는 rhinovirus, adenovirus, influenza virus, parainfluenza virus, coxsackievirus, coronavirus, echovirus, respiratory syncytial virus, metapneumovirus 등이 있으며, 주로 사춘기 젊은 연령의 성인에서 Epstein Barr virus (EBV)에 의해 발생하는 전염단핵구증(infectious mononucleosis)과 급성 human immunodeficiency virus (HIV) 감염, cytomegalovirus 감염 및 herpes simplex virus 감염의 감별이 필요하다 [9-11]. 인후통을 호소하는 환자에서 일관화된 항생제 사용은 세균성 급성 인두편도염의 증상 발생 기간을 단축시키고 세균성 합병증의 빈도를 줄이는 장점은 있으나, 약물 부작용의 빈도를 올리고 항생

제 내성균의 전파를 증가시켜 의료 비용을 증가시킬 수 있다 [10]. 따라서, 임상 현장에서 적극적인 원인균의 감별을 바탕으로, 바이러스성 급성 인두편도염에 대한 항생제 처방을 피하고, 세균성 급성 인두편도염에 대해 적절한 항생제 치료가 이루어져야 한다 [11,12].

세균성 급성 인두편도염의 가장 흔한 원인은 *S. pyogenes*로 급성 인두편도염 성인 환자의 5-15%를 차지한다 [5,6,13]. *S. pyogenes* 감염에 의한 급성 인두편도염은 중이염, 편도주위농양 등 급성 화농성 합병증과 류마티스열, 급성 사구체신염의 비화농성 합병증을 초래할 수 있기 때문에 빠른 진단과 적절한 항생제 치료가 권장된다 [5,14]. 급성 류마티스열은 그 빈도가 많이 줄었지만 임상적 의미는 크다. 그 밖에도 C 또는 G군 베타용혈성연쇄구균 (Group C or G beta-hemolytic Streptococci), *C. pneumoniae*, *M. pneumoniae*, *Arcanobacterium haemolyticum*, *Corynebacterium diphtheriae*, *Fusobacterium necrophorum*, *Neisseria gonorrhoeae*, *Treponema pallidum*, *Francisella tularensis* 등이 드물게 급성 인두편도염을 일으킨다.

급성 인두편도염의 원인균 감별은 병력 청취 및 이학적 검사와 인두 도말 검체를 이용한 배양 검사나 신속 항원 검사가 도움이 된다. 콧물, 코막힘, 기침, 결막염, 쇠 목소리, 설사, 구강 궤양 혹은 수포성 구강병변 등이 있는 경우, 세균성 급성 인두편도염보다 바이러스성 급성 인두편도염의 가능성이 높다 [15]. 반면, 삼킴곤란(연하곤란), 인후통, 발열, 두통, 복통, 오심, 구토 또는 연구개의 점상출혈, 경부 림프절 종대 및 성홍열 양상의 발진은 세균성 급성 인두편도염, 특히 *S. pyogenes* 감염의 가능성을 시사한다 [15]. 임상 증상 및 징후로 원인균을 감별하는 것은 의료진 사이에 높은 일치율은 보이지만 [16, 17], 경험이 많은 의료진도 인두 도말 (throat swab) 배양 검사 양성을 예측하는 민감도와 특이도는 각각 55-74%과 58-76%로 평가된다 [6, 18, 19].



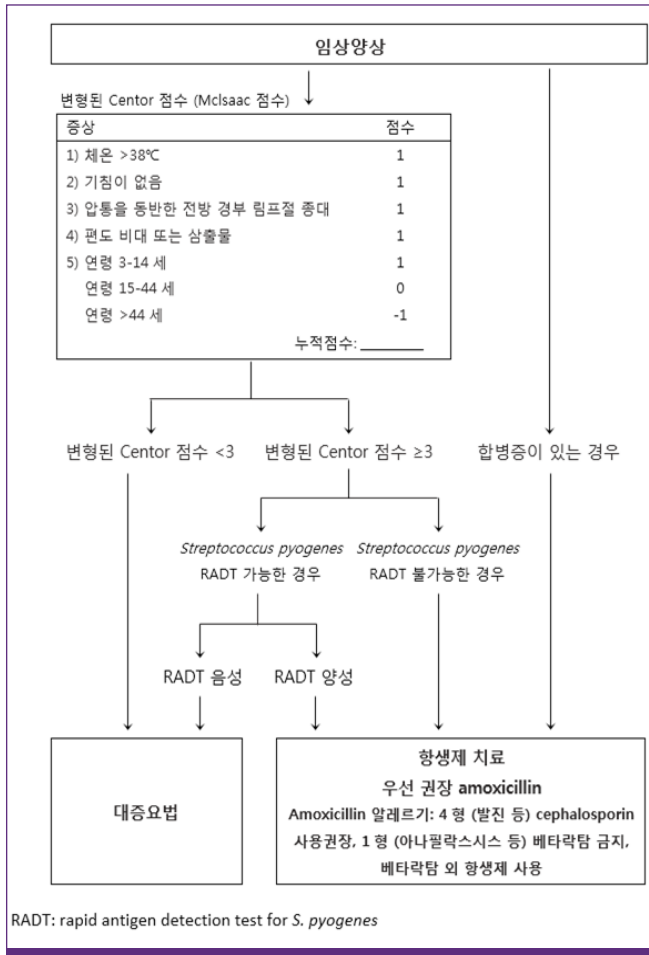

그림 1. 급성 인두 편도염에서 항생제 사용의 흐름도.

표 2. 변형된 Centor 점수(Mclsaac 점수)에 따른 Streptococcus pyogenes 감염의 위험도 (Mclsaac WJ, JAMA 2004;291:1587-95.)

| 총점 | <i>S. pyogenes</i> 감염의 위험도 (%) |
|----|--------------------------------|
| ≥4 | 51-53                          |
| 3  | 28-35                          |
| 2  | 11-17                          |
| 1  | 5-10                           |
| ≤0 | 1-2.5                          |

비록 정확한 진단을 하는 데는 한계를 보이지만 다양한 임상 예측 도구들이 제시되어왔고 [6], 현실적으로 임상 현장에서 가장 흔히 사용되는 임상적 예측 도구는 Centor 점수 체계이다 [5, 6]. 1981년 성인에서 처음 제안되었던 Centor 점수 체계는 증상과 징후 척도를 점수화하였고, 1998년에는 나이에 관한 기준을 추가한 변형된 Centor 점수 체계 (Mclsaac 점수 체계)가 제안되었다 (그림 1) [20]. 변형된 Centor 점수 (Mclsaac 점수 체계)와 *S. pyogenes* 감염과의 연관성을 연구하여 Centor 점수에 따른 *S. pyogenes* 감염의 위험도를 예측하였고, 이를 *S. pyogenes* 감염의 진단에 활용한다 (표 2) [21]. Centor 점수 3점 이상인 경우 인두 도말 배양 검사 양성에 대한 양성 예측도와 음

성 예측도는 *S. pyogenes* 감염의 유병률에 따라 다양하지만 이전 연구에서 각각 40-60% 및 약 80%로 제시되었고, 민감도와 특이도는 모두 약 75%로 제시되었다 [6, 21-23]. 2008년 NICE (National Institute of Health and Care Excellence) 영국 가이드라인에서는 임상 증상의 중증도에 따라 Centor 점수 3점 이상인 경우 항생제 처방을 고려할 수 있다고 권고하고 있다 [24]. 이전 연구를 통해, Centor 점수 3-4점을 기준으로 항생제를 사용한 경우, 증상 호전과 합병증 예방에 도움이 되었고, 부적절한 항생제 사용을 감소시킨 결과를 보고하였다 [22, 23, 25]. 본 진료지침에서는 임상 현장에서 변형된 Centor 점수 체계의 사용을 권고하고자 한다.

2012년 Infectious Diseases Society of America (IDSA) 미국 가이드라인에 따르면 임상양상만으로는 *S. pyogenes* 인두편도염과 바이러스성 인두편도염을 구분하기 어려우므로, 바이러스성 질환이 강력히 의심되는 경우를 제외하고 *S. pyogenes* 인두편도염의 의심이 되는 경우라면 반드시 신속항원 검사 또는 배양 검사를 시행하도록 추천하였다 [11]. 인두 도말 검체로 신속항원 검출검사 (rapid antigen diagnostic test, RADT) 혹은 배양검사를 시행하여 *S. pyogenes*이 검출되면 *S. pyogenes* 인두편도염으로 진단한다 [11]. 인두 도말 검사방법은 다음과 같다. ① 혀를 설압자로 눌러 양쪽 구개편도 및 목젓이 잘 노출되도록 한다. ② 검체 채취용 면봉을 목젓에 닿지 않게 주의하면서 목젓보다 안쪽으로 위치시킨다. ③ 한쪽 구개편도, 인두후벽, 반대쪽 구개편도순으로 문질러 인두 검체를 채취한다. ④ 검체 채취 부위에 삼출물 등 병변이 있는 경우 함께 검체를 채취한다. ⑤ 검체 채취 과정에서 면봉이 혀나 볼 점막과 같은 구강 내 다른 부위에 닿거나, 타액이 검체에 섞이지 않도록 주의한다. ⑥ 검체를 채취한 면봉을 즉시 검사용 멸균 튜브에 담아 검사실로 보낸다 (그림 2) [26].

현장에서 실시간으로 시행 및 확인 가능한 신속 항원 검사는 배양 검사를 기준으로 민감도와 특이도가 각각 65-91% 및 62-97%로 대상 환자 및 검사 방법에 따라 다양하게 보고되고 있다 [27-31]. 신속항원 검출검사 결과가 음성이면 인두 도말 배양 검사를 시행할 수 있지만 일반적으로 성인에서는 두 검사를 모두 시행하는 것을 권유하지 않는다 [11]. 신속항원 검출검사 결과가 양성이면 배양 검사를 하지 않고 *S. pyogenes* 인두편도염으로 진단할 수 있다 [11]. 국내에서의 신속항원 검출검사 자료는 주로 소아에서 결과가 있으며 유용함을 보고하고 있다 [32-35]. 항생제의 적절한 사용을 위해 그 사용이 활성화되는 것이 필요하다 [12].

항-사슬알균 용혈소 O (anti-streptolysin O; ASO) 항체가 검사는 급성 류마티스열과 급성 사구체신염과 같은 비화농성 합병증을 진단하는데 유용할 수 있다 [36]. 하지만, 역가가 발병 3-8주까지도 최고치에 도달하지 못하고, 수 개월간 상승이 지속되어 급성 인두편도염 진단에는 유용하지 않다 [37, 38]. 일반적으로 급성 인두편도염 환자에서 C-반응 단백질, 전체 백혈구수, 호중성 과립구수가 증가되지만, 일반적으로 성인 환자에서 세균성 급성 인두편도염을 진단하는 데 낮은 민감도 (66-90%)와 특이도 (45-75%)를 보인다 [39]. 프로칼시토닌 (procalcitonin)과 적혈구침강속도 (erythrocyte sedimentation rate, ESR) 역시 세

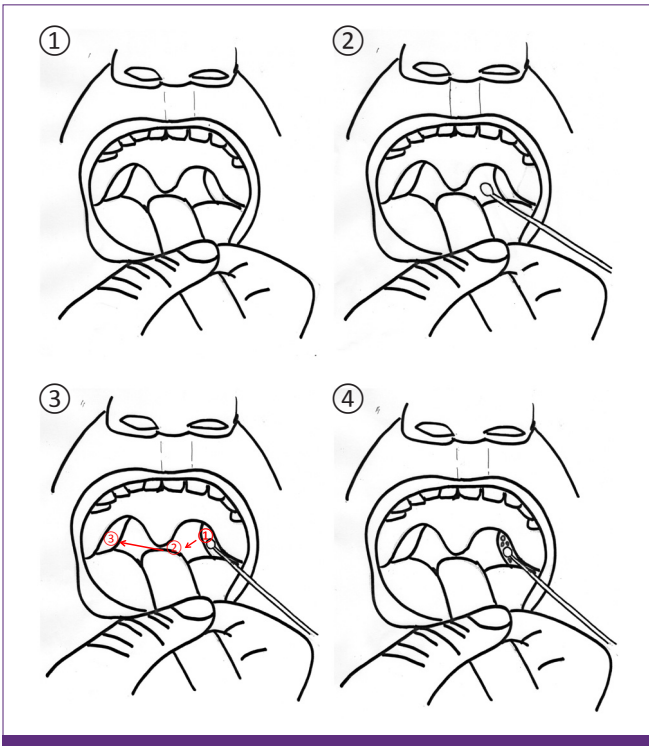

**그림 2.** 인두 도말 시행 방법 ① 혀를 설압자로 눌러 양쪽 구개편도 및 목젖이 잘 노출되도록 한다. ② 검체 채취용 면봉을 목젖에 닿지 않게 주의하면서 목젖보다 안쪽으로 위치시킨다. ③ 한쪽 구개편도, 인두후벽, 반대쪽 구개편도 순으로 문질러 인두 검체를 채취한다. ④ 검체 채취 부위에 삼출물 등 병변이 있는 경우 함께 검체를 채취한다.)

균성 급성 인두편도염 감별 진단에 유용성은 낮다 [40]. 이전 연구에서 C-반응단백 35 mg/L (3.5 mg/dL)와 임상적 예측 도구를 함께 사용하면 세균성 급성 인두편도염 진단을 도울 수 있다는 보고가 있으나 [41], 일반적으로 급성 인두편도염 의심 환자에서 혈액 검사를 권유하지는 않는다.

2008년 NICE 영국 가이드라인에는 Centor 점수를 활용하여 3점 이상인 경우 환자 상태에 따라서 *S. pyogenes* 감염에 대한 항생제 처방을 권유한다 [24, 42]. 반면, 미국감염학회에서는 정확한 세균학적 진단 후 항생제를 처방하도록 권고하고 있다 [11]. 본 임상 진료 지침에서는 급성 인두편도염 환자에서 합병증이 있는 경우에 항생제 처방을 권고하고, 임상적 중증도에 따라 변형된 Centor 점수 (Mclsaac 점수)가 3점 이상인 경우, 신속항원 검출검사를 시행하여 양성이면 항생제 치료를 권고한다. 신속항원 검출검사를 시행할 수 없는 경우에는 변형된 Centor 점수 (Mclsaac 점수)에 따라 항생제 치료를 고려할 수 있다 (그림 1).

항생제의 투여 전략에서 최근의 큰 규모의 코호트 관찰연구는 늦어진 (delayed) 항생제 처방 시에도 즉각적인 (immediate) 항생제 처방과 유사한 화농성 합병증의 감소를 보고하였다 [14].

2) 세균성 인두편도염 환자에서 초기 경험적 항생제는 어떤 것을 사용해야 하는가?

1. Amoxicillin 10일 요법을 사용할 수 있다 (단, 전염단핵구증이 의심될 때는 amoxicillin을 사용하지 않는다) (근거수준 높음, 권고강도 강함).
2. 환자 순응도가 좋지 않거나 환자의 상황 상 10일 항생제 요법이 어려울 경우 cefdinir, azithromycin 5일 요법을 사용할 수 있다 (근거수준 중등도, 권고강도 강함).
3. 주사요법으로서 benzathine penicillin G를 1회 단일요법으로 근주할 수 있다. 성인: 1,200,000 Unit 1회 IM (근거수준 높음, 권고강도 강함). 그러나 국내에서는 1차적으로 사용을 권하지는 않는다.
4. Penicillin 알레르기가 있는 경우: 4형 (발진 등) 알레르기 경우 1세대 cephalosporin (cephalexin, cefadroxil) 10일 요법 또는 clindamycin 또는 clarithromycin 10일요법, azithromycin 5일요법 또는 cefdinir, cefpodoxime 5일요법을 할 수 있다 (근거수준 중등도, 권고강도 강함).
5. 1형 (anaphylaxis 등) 알레르기의 경우 모든 베타락탐 항생제 (cephalosporin 등)는 사용하지 않는다 (근거수준 중등도, 권고강도 강함).

세균성 급성 인두편도염은 *S. pyogenes* 이외에도 앞서 언급한 다양한 세균에 의해 발생하기 때문에, 치료대상 미생물의 종류와 항생제 감수성, 항생제의 항균 범위, 약물 부작용, 환자의 기저 질환, 약물 상호작용, 비용 등을 고려하여 항생제의 종류를 결정해야 한다. 세균성 급성 인두편도염에 관한 미국 및 유럽 임상 진료 지침에서는 penicillin V를 1차약제로 권고한다 [11, 42]. 국내 자료를 포함하여 최근까지 전 세계적으로 급성 인두편도염에서 분리된 *S. pyogenes* 임상분리주의 penicillin 내성이 보고되지 않았다 [43-51]. *S. pyogenes*의 베타락탐 항생제에 대한 내성은 다른 균에서의 항생제 내성 증가와는 달리 거의 보고되지 않는다 [43-51]. 특히, penicillin은 항생제 가격이 저렴하여 비용-효과적이며, 좁은 항균 범위를 가지고 있고, 오랜 시간동안 그 효과가 입증되어 세균성 인두편도염 치료에 가장 기본으로 사용할 수 있는 장점이 있다 [43-47].

그러나, 국내에서는 경구 penicillin V가 생산 및 유통되고 있지 않으므로, amoxicillin을 1차 항생제로 사용할 수 있다 (표 3) [11]. 프랑스에서 시행된 다기관 연구를 통해, *S. pyogenes*에 의한 급성 인두편도염 환자에서 amoxicillin 6일 투여군과 penicillin V 10일 투여군 사이에 치료 효과와 안정성에서 유의한 차이를 보이지 않았으며 [52, 53], 미국에서 진행된 전향적 관찰연구에서도 amoxicillin이 penicillin보다 미생물학적 반응 및 임상적 효과가 더 우수하다고 보고하였다 [54]. 특히, 경구 amoxicillin이 penicillin보다 항균 범위가 다소 넓으나, 음식과 함께 동시에 섭취해도 penicillin처럼 경구 생체이용률이 낮지 않고, 1일 1회 투여가 가능하기 때문에 환자의 순응도 측면에서 장점이 있다 [55-59]. 다만 Epstein-Barr virus (EBV)로 인한 전염성단핵구증이 있을 경우에 amoxicillin을 사용할 경우 70-100%에서 약물발

표 3. *Streptococcus pyogenes* 급성 인두편도염의 권고 항생제 용량 및 치료 기간

| 약제                            | 경로                                       | 용량                      | 투여기간                                              |     |
|-------------------------------|------------------------------------------|-------------------------|---------------------------------------------------|-----|
| Penicillin 과민 반응이 없는 환자       | Preferred                                | Amoxicillin             | 경구 50 mg/kg를 1일 1회 (최대 1000mg)<br>25 mg/kg를 1일 2회 | 10일 |
|                               | Alternative                              | Amoxicillin/clavulanate | 경구 1회 500/125 mg 하루 3회                            | 10일 |
|                               |                                          | Ampicillin/sulbactam    | 경구 1회 500/250 mg 하루 3회                            | 10일 |
|                               |                                          | Benzathine penicillin G | 근육 주사 1,200,000 Unit                              | 1회  |
| Penicillin 4형 알레르기 (발진 등)     | Preferred; 1st-generation cephalosporins | Cephalexin              | 경구 1회 500 mg을 하루 2회                               | 10일 |
|                               |                                          | Cefadroxil              | 경구 1회 1000 mg을 하루 1회                              | 10일 |
|                               | Alternative                              | Cefpodoxime             | 경구 1회 100 mg을 하루 2회                               | 5일  |
|                               |                                          | Cefdinir                | 경구 1회 300 mg을 하루 2회                               | 5일  |
| Penicillin 1형 알레르기 (아나필락시스 등) | Clindamycin                              | Clindamycin             | 경구 1회 300 mg을 하루 3회                               | 10일 |
|                               |                                          | Azithromycin            | 경구 1회 500 mg을 하루 1회                               | 5일  |
|                               |                                          | Clarithromycin          | 경구 1회 250 mg을 하루 2회                               | 10일 |

진 (drug rash)이 발생 할 수 있기 때문에 amoxicillin을 사용해서는 안 된다 [11, 42]. 이런 경우에는 2차 약제 사용을 고려 해볼 수 있다.

1950년대부터 benzathine penicillin G 주사제는 penicillin V와 함께 세균성 급성 인두편도염의 1차 치료제로 사용되어왔다. 미국 심장 협회와 미국감염학회에서도 penicillin V와 함께 benzathine penicillin G 근주를 함께 권고한다 [11, 12]. 하지만, 경구 항생제는 주사제 투약에 비해 근주 시 주사 부위 통증이나 합병증 발생률이 낮고 심한 알레르기 반응의 빈도가 낮지만, 약물 순응도가 문제가 될 수 있다 [12, 60]. 따라서, 10일간의 경구 항생제 투약이 어려운 것으로 판단되는 환자에 대해서는 benzathine penicillin G 근주를 사용해볼 수 있다 [12, 60, 61]. Amoxicillin 경구 항생제 10일 투약과 benzathine penicillin G 일회 근주의 임상적 효과는 유의한 차이를 보이지 않았다 [61, 62].

Penicillin 알레르기를 보이는 경우 4형 (발진 등) 알레르기에는 1세대 cephalosporin (cephalexin, cefadroxil) 10일 요법 또는 clindamycin 또는 clarithromycin 10일요법, azithromycin 5일요법 또는 cefdinir, cefpodoxime 5일요법을 할 수 있다 (표 3) [11]. 1형 (anaphylaxis 등) 알레르기의 경우 모든 베타락탐 항생제 (cephalosporin 등)는 사용하지 않는다 (표 3). 일부 연구에서 넓은 스펙트럼을 가진 cephalosporin을 이용한 5일요법이 penicillin V를 이용한 10일 요법보다 약간 더 나은 정도의 효과를 보이기는 했으나, cefdinir, cefpodoxime 등을 이용한 5일 요법도 가격이 상대적으로 비싸고 넓은 항생제 스펙트럼으로 인해 일반적으로 1차 항생제로 고려되지는 않는다 (표 3) [11, 24, 42].

3) 언제 2차 약제 투약이 필요한가?

1. *S. pyogenes*의 급성 인두편도염에서 1차 약제 치료 실패 시, ampicillin/sulbactam, amoxicillin/clavulanate, 좁은 항균 범위의 cephalosporins, clindamycin을 2차 치료제로 고려해볼 수 있다 (근거수준 중등도, 권고강도 약함).
2. 배양 검사에서 *S. pyogenes* 분리가 지속되거나 재발이 발생하면 2차 약제 투약을 고려할 수 있다 (근거수준 중등도, 권고강도 약함).
3. 중이염, 편도 농양 등의 급성 화농성 합병증과 류마티스열, 급성 사구체신염의 비화농성 합병증이 동반되면 항생제 변경을 고려할 수 있다 (근거수준 중등도, 권고강도 강함).

일반적으로 세균성 인두편도염에 대한 1차 치료제 (penicillin V 혹은 amoxicillin)는 *S. pyogenes*에 대한 항생제로 [63], 투약 후 48-72시간 이내에 치료 반응을 보이기 시작하여 4-5일 이내에 임상 증상이 호전된다 [8, 64]. 투약 후 48-72시간 이내에 치료 반응이 없다면 1차 치료제의 치료 실패로 판단하고 다음의 내용을 확인한다 [64, 65].

- 첫째, 약물 순응도를 확인해야 한다.
- 둘째, *S. pyogenes*의 penicillin 내성은 매우 드물지만, 최근 항생제 투약 이력을 확인 후, ampicillin/sulbactam, amoxicillin/clavulanate, 좁은 항균 범위의 cephalosporin, clindamycin을 2차 치료제로 고려해볼 수 있다 (표 3) [64]. Cephalexin 10일 치료군과 amoxicillin 1일 1회 10일 치료군 사이에 치료 효과는 차이를 보이지 않았으며 [66], ampicillin/sulbactam, amoxicillin/clavulanate 치료 효과에 대한 자료는 매우 제한적이다 [12, 67, 68]. 한편, penicillin 계열 항균제는 임상 효과, 안정성, 낮은 비용 등으로 1차 치료제로 사용되고 있으나, 과민 반응에 대한 우려 등으로 erythromycin 등의 macrolide 또는 clinda-



mycin 항균제 사용이 증가하면서 *S. pyogenes*의 이들 항균제에 대한 내성률이 상승하고 있다. 진주에 거주하는 급성 인두염 환자에서 분리한 *S. pyogenes*의 2002년 macrolide 내성률은 51%까지 보고되었다 [48]. 1998-2003년 서울과 마산에서 erythromycin 내성률은 각각 28.5%와 20.5%를 보였다 [49, 50]. 이후, 2009-2011년 사이에는 erythromycin, azithromycin, clindamycin의 내성률은 각각 42.9%, 42.9%, 30.6%로 확인되었다 [51]. 따라서, macrolide와 clindamycin은 1차 약제로 권고되지 않으며, 사용시 치료 실패 여부에 대한 평가가 요구된다.

셋째, 급성 인두편도염의 원인 미생물은 *S. pyogenes* 이외에도 EBV, adenovirus, mycoplasma, *Fusobacterium* spp., *Corynebacterium diphtheriae*, *Acanobacterium haemolyticum*, *N. gonorrhoeae* 등 다양한 가능성을 함께 고려해야 한다 [69]. Amoxicillin 투여 후 발진이 생기면 EBV 감염증의 가능성이 있다 [42]. *Fusobacterium* 감염증의 경우 ampicillin/sulbactam 혹은 ampicillin과 metronidazole을 병합 치료한다. 드물게 penicillin 내성 *Fusobacterium* spp.이 보고되기도 한다 [70]. *C. diphtheriae* 감염증은 penicillin과 erythromycin이 권고된다. *N. gonorrhoeae*에 의한 급성 편도염은 제균이 어려워 치료 종료 시 추적 배양 검사가 권고되며, 치료제는 ceftriaxone (250 mg IM 1회 투여)이 사용된다 [71].

한편, 배양 검사에서 *S. pyogenes* 분리가 지속되거나 재발이 발생하면 2차 약제 투약을 고려할 수 있으며, 자세한 내용은 다음의 핵심 질문을 통해 상세히 기술하였다.

급성 인두편도염의 화농성 합병증은 편도주위농양, 측인두강 농양(parapharyngeal abscess), 임파선염, 부비동염, 중이염, 유돌염(mastoiditis), 괴사근막염 혹은 독성쇼크증후군 등이 있다 [5, 38, 39]. 두경부 심부 농양이 발생되면 2세대 혹은 3세대 cephalosporin (예, ceftriaxone, cefuroxime)과 clindamycin의 병합 투약이나 ampicillin/sulbactam을 투약할 수 있다. 원인균 규명 및 치료 목적으로 흡인 천자나 절개 배농의 필요성을 적극적으로 고려해야 한다. 내경정맥 패혈혈전염에 의한 Lemierre 증후군 또한 *Fusobacterium* spp.에 의해 드물게 발생한다 [29]. 비화농성 합병증은 *S. pyogenes* 감염증에 의한 류마티스열과 급성 사구체 신염이 있다 [11].

#### 4) 반복되는 세균성 인두편도염 환자에 대한 항생제 치료는 어떻게 하는가?

1. 재발성 인두편도염에 대한 예방적 항생제 치료는 권장되지 않는다 (근거수준 높음, 권고강도 약함).
2. 재발성 급성 인두편도염에 대해 1차 항생제로 다시 치료해 볼 수 있으며, 2차 항생제로는 좁은 항균 범위의 cephalosporin (cephradine, cefadroxil), clindamycin, amoxicillin/clavulanate 혹은 penicillin과 rifampin 병합 치료를 고려할 수 있다 (근거수준 높음, 권고강도 약함).

세균성 급성 인두편도염의 재발이 가능한데, 부적절한 항생제 투약, 불충분한 항생제의 용량 또는 치료, 환자의 낮은 순응도, 재감염

발생 및 가능성이 매우 낮지만 penicillin 내성이 있는 경우에 항생제 치료에도 불구하고 다시 발생할 수 있다 [72, 73]. 또한, 급성 상기도 호흡기 바이러스 감염증 후 *S. pyogenes* 집락화가 지속되는 경우도 고려할 수 있다.

*S. pyogenes* 감염증에서 항생제 치료 종료 후 배양 검사는 증상이 지속되거나 재발이 의심되는 경우 혹은 이전에 류마티스열이나 급성 사구체신염 병력이 있는 경우 시행한다. 일반적으로 치료 종료 2-7일 시점에서 시행한다. 치료 실패와 만성 보균 상태는 구분되어야 하므로 [65], 추적 검사에서 균주가 분리되더라도 증상이 호전되었다면 항생제를 다시 투약하지 않는다. 하지만, 이전에 류마티스열의 병력이 있거나 가족력이 있다면 무증상 환자에서도 재치료 대상이 된다. 증상이 지속된다면 1차 약제로 다시 치료할 수 있고, 약물 순응도가 낮다면 penicillin G를 고려할 수 있지만 아직 정립된 자료는 부족하다. Penicillin 제균 치료 실패 시 2차 약제는 좁은 항균 범위의 cephalosporin (cephradine, cefadroxil), clindamycin, amoxicillin/clavulanate 혹은 penicillin과 rifampin 병합 치료를 고려할 수 있다 [12, 65]. 넓은 항균 범위의 cephalosporin (cefprozil, cefuroxime axetil, cefdinir, cefditoren, cefpodoxime, cefaclor 등)은 가격이 비싸고, 항균 범위가 넓어 일반적으로 권고되지 않는다 [60, 74]. 세균성 급성 인두편도염에서 cefaclor 10일 요법은 amoxicillin/clavulanate 10일 요법과 임상적 효과가 유사하였고, 일부 소화기계 부작용이 cefaclor군에서 더 적게 발생하였다 [75]. 또한, cefaclor 5일 요법도 amoxicillin 10일 요법과 치료 효과가 유사하였다 [76]. 한편, cefaclor 10일 치료군은 erythromycin 10일 치료군보다 치료 반응이 우수하였고, 이는 *S. pyogenes*의 마크로라이드 내성에 의한 것으로 보고된다 [77]. 뿐만 아니라, cefditoren pivoxil 5일 치료군 역시 amoxicillin 10일 치료군과 치료 반응에서 차이를 보이지 않았다 [78].

이전에 발표된 무작위 대조군 연구들에서, 급성 인두편도염 환자에게 항생제 치료를 하는 것이 차후 인두편도염 발생 횟수를 낮추는 지 또는 예방적인 항생제 투약이 인두편도염의 재발 빈도를 감소시키는지에 대해 설명하고 있다 [73, 79, 80]. Benzathine penicillin G를 예방적으로 사용한 소아 집단에서 투여 전 4개월과 투여 후 4개월간 *S. pyogenes* 인두염 발생을 비교하였을 때 투여 후 92%가 감소되는 결과를 보였으나, 대조군에게 위약을 사용하지 않았다는 증거적 한계를 갖고 있다 [79]. 편도절제술을 대체하여 azithromycin를 장기간 복용한 경우도 빈번한 재발성 편도염 치료에 효과가 없었다 [73]. 소아에서 cefpodoxime proxetil을 예방적으로 사용한 연구에서는 12개월 후 인두편도염의 급성 발병 횟수가 예방적 항생제를 사용한 집단에서 10% 더 감소하였으나, 이 연구는 소아 집단에 한정되어 시행되었으며 항생제 내성의 위험성 및 단기 치료경과만을 보여주고 있어 더 긴 기간에 걸친 연구가 필요하다 [80]. 요약하면 앞선 3개의 연구 중 한 연구에서는 예방적 항생제 투약이 효과가 없는 것으로 나타났으며, 다른 두 개의 연구에서는 작지만 통계적으로 의미 있는 효과를 보였다. 그러나, 이러한 연구들은 방법론적인 한계를 보여 이들로부터의 결론을 일반화하여 신뢰하기는 어렵다. 한편, 이들 연구에서 치

료 혹은 예방 목적으로 cephalosporin을 사용할 시에 인후통의 빈도가 감소하였다고 보고되었으나, azithromycin과 같은 macrolide계 항생제들로부터는 유사한 효과가 도출되지 않았다 [79, 80].

5) 급성 세균성 인두편도염이 의심되는 진료 시 어떤 상황에서 중증으로의 진행이나 급성 화농성 합병증의 위험을 고려해 해당과 전문의에게 전원하여야 하는가?

1. 증상이 매우 심하고 지속되며, 침을 삼키기 힘들어하고, 목 소리가 변하는 (“hot potato” voice) 경우 및 기도의 막힘을 시사하는 다른 임상 증상 등이 있을 때 인두편도염의 급성 합병증을 고려하여야 하며 수술적 처치가 필요하지 판단하기 위해 해당과 전문의에게 전원하는 것이 필요하다 (근거 수준 매우 낮음, 권고강도 강함).

편도주위 농양 (peritonsillar abscess)은 가장 흔한 심부 경부 감염 (deep neck infection)이다. 다른 심부 경부 감염으로는 인두주위 농양 (parapharyngeal abscess) 및 후인두 농양 (retropharyngeal abscess)이 있고 이러한 인두부위 공간 (parapharyngeal space)은 인두염의 합병증으로 감염이 발생할 수 있다 [81-84]. 또한 이 질환들과 처음부터 인두편도염과의 감별 진단이 필요하다. 편도주위 연조직염 (peritonsillar cellulitis 또는 phlegmon)은 편도주위 공간에 감염은 있으나 농양이 형성되지는 않은 경우에 사용하는 용어이다. 편도주위 농양은 심부 경부감염의 약 50% 정도를 차지하며 사춘기 및 성인에서 흔하고 소아에서도 가능하다 [2, 85]. 심부 경부 감염에서 가장 중요한 것은 기도의 평가 및 유지이다 [26]. 안절부절 하지 못하고 삼키기 힘들어하며 침을 흘리는 환자는 반드시 기도를 면밀히 관찰하고 확보해야 하며 전문가에게 전원 시키기 전이라도 기도삽관 등의 조치가 필요하지 판단하고 필요 시 수행해야 한다 [86]. 위험한 임상적 증상 및 징후는 다음과 같다 (표 4). 검사의 경우 초음파 검사나 컴퓨터 단층촬영이 필요할 수 있으며 초음파 검사의 경우 숙련된 사람이 필요하고 컴퓨터 단층촬영의 경우 방사선 노출 및 조영제 사용의 부작용 가능성의 단점이 있으나 시술이 있는 경우 빨리 할 수 있고 객관적인 영상을 제공해주는 장점이 있다. 컴퓨터 단층 촬영이 흔히 진단 및 타 질환과의 감별진단을 위해 행해 진다 [83, 84]. 자기 공명 영상도 적용 가능하다 [83]. 성인의 경우 심부 경부농양은 치아와 연관된 경

표 4. 세균성 인두편도염 중 나쁜 예후를 시사하는 임상 소견들

|                        |
|------------------------|
| 과도한 침흘림 (drooling)     |
| 입벌림 장애 (trismus)       |
| 편측 안면 부종               |
| 삼킴곤란                   |
| 호흡곤란                   |
| 지속적 편측 편도 비대           |
| 경부 강직 (neck stiffness) |
| 인두 또는 귀에 피 (blood)     |

우가 많고 소아와 청소년 및 젊은 청년에서는 편도염의 합병증의 빈도가 더 높다 [26, 81-84].

면역저하자의 경우 일반적이지 않은 다양한 원인균에 의한 잘 반응하지 않는 편도염이 있을 수 있으므로 원인에 대한 접근을 더 넓히는 것과 효과적인 치료를 위해 전원이 필요하다 [87, 88].

본 지침에서의 권유와 *S. pyogenes*에 의한 급성 인두편도염에 대한 주요 진료지침 한국 소아 급성 상기도 감염의 항생제 사용지침 (2016), 미국감염병학회 (2012), 미국내과학회 (2001), 미국소아학회 (2003), 영국 NICE (2008)과 비교는 표 5와 같다 [11, 89-93].

6) 급성 세균성 부비동염의 증상 및 진찰소견을 보이는 환자에게 언제부터 경험적 항생제 처방을 시작해야 하는가?

1. 급성 세균성 부비동염으로 진단된 경우 항생제를 진단 초기에 처방할 수 있다 (근거수준 높음, 권고강도 강함).
2. 급성 세균성 부비동염 진단 후 7일 이내 증상의 호전이 없거나 증상이 악화되는 경우 경험적 항생제 사용을 시작한다 (근거수준 높음, 권고강도 강함).
3. 아래 중증의 증상 또는 진찰소견을 동반한 경우는 항생제 치료를 시작 한다: 39°C 이상의 고열이나 3-4일간 지속된 안면 통증 또는 농성 비루 (근거수준 높음, 권고강도 강함).

부비동염이란, 감염, 알레르기, 자가면역 등으로 코 통로와 부비동의 점막 내벽에 발생하는 염증으로, 주로 비강과 부비강의 염증이 동반되므로 비부비동염 (rhinosinusitis)으로도 흔히 사용된다 [94]. 주된 감염 위치에 따라서 상악동 (maxillary), 전두동 (frontal), 사골동 (ethmoid), 접형동 (sphenoid) 부비동염으로 분류될 수 있고, 병기에 따라 급성 (4주 미만), 아급성 (4주-3개월) 및 만성 (3개월 이상) 부비동염으로 구분이 가능하다 [95]. 또한, 발생 장소에 따라 지역사회 획득 감염, 의료관련 감염 및 원내 감염으로 구분할 수 있다. 급성 부비동염의 정의는 표 6에 상세히 기술하였다 (표 6) [94-97]. 부비동염은 감염성 원인 이외에도 혈관운동성, 위축성 부비동염 뿐만 아니라, 최근 증가하는 알레르기성 부비동염 등 비감염성 원인을 감별해야 한다 [98].

감염성 원인의 부비동염은 바이러스, 세균 또는 곰팡이 등 다양한 미생물에 의해 발생할 수 있다. 이 중 세균이 차지하는 비율은 2-10%로, 나머지 90-98%는 바이러스가 원인이다 [99]. 바이러스성 급성 부비동염의 0.5-2%가 세균성 급성 부비동염으로 진행할 수 있다 [100, 101]. 급성 부비동염 환자에서 상악동 천자 검체를 이용하여 규명한 원인 세균은 *Streptococcus pneumoniae*, *Haemophilus influenzae*, 혐기균, streptococcal species, *Moraxella catarrhalis*, *Staphylococcus aureus* 등이 있다. 그 밖에 원인 바이러스는 rhinovirus, parainfluenza virus, influenza virus 등이 알려져 있고, 진균으로는 드물지만 *Aspergillus*, *Zygomycoses*, *Phaeoohyphomycis*, *Pseudallescheria*, *Hyphomycis* 등이 관련이 있다 [102, 103].

급성 지역사회 획득 세균성 부비동염을 포함한, 성인 급성 부비동

표 5. Streptococcus pyogenes에 의한 급성 인두편도염의 주요 진료지침 비교

| 항목                     | 본 지침                                                                 | 한국 소아 급성 상기도 감염의 항생제 사용지침 (2016)                                  | 미국감염병학회 (2012)                                                                                         | 미국내과학회 (2001)                                                                                        | 미국소아학회 (2003)                                                                                        | 영국 NICE (2008)  |
|------------------------|----------------------------------------------------------------------|-------------------------------------------------------------------|--------------------------------------------------------------------------------------------------------|------------------------------------------------------------------------------------------------------|------------------------------------------------------------------------------------------------------|-----------------|
| 급성인두편도염의 초기진단          | 변형된 Centor 점수 또는 S. pyogenes 감염의 임상 양상                               | 변형된 Centor 점수 또는 S. pyogenes 감염의 임상 양상                            | S. pyogenes 감염을 시사하는 임상양상 및 역학 (예: 갑자기 시작된 인후통, 발열, 편도삼출물 등이 해당./ 콧물, 쇠목소리, 기침, 구강구양 등은 바이러스 급성인두염 시사) | 변형된 Centor 점수                                                                                        | 변형된 Centor 점수                                                                                        | 변형된 Centor 점수   |
| 진단검사권고                 | 변형된 Centor 점수 3점 이상                                                  | S. pyogenes 의심소견이 있거나, 변형된 Centor 점수 3점 이상                        | 모든 S. pyogenes 의심환자에서 시행                                                                               | 변형된 Centor 점수 3점 이상                                                                                  | 변형된 Centor 점수 3점 이상                                                                                  | 검사 권고하지 않음      |
| 신속항원검출검사에서 음성시 추가 배양검사 | 성인: 아니오                                                              | 소아: 예                                                             | 소아: 예<br>성인: 아니오                                                                                       | 소아: 예<br>성인: 일부학회에서 승인*                                                                              | 소아: 예<br>성인: 아니오                                                                                     | 검사 권고하지 않음      |
| 항생제가 필요한 경우            | 1. 변형된 Centor 점수 3점 이상<br>2. 합병증 (예: 중이염, 편도주위농양, 급성 사구체신염, 류마티스열 등) | S. pyogenes 신속항원검사 혹은 배양 검사에서 양성                                  | S. pyogenes 신속항원검사 혹은 배양 검사에서 양성                                                                       | S. pyogenes 신속항원검사 혹은 배양 검사에서 양성                                                                     | 1. 경험적 항생제: 변형된 Centor 점수 4점 이상<br>2. 항생제치료: S. pyogenes 신속항원검사 혹은 배양 검사에서 양성                        | Centor 점수 3점 이상 |
| 항생제                    | 경구 amoxicillin                                                       | 경구 amoxicillin                                                    | 경구 penicillin V, 근육주사 penicillin G benzathine; 소아에서는 경구 amoxicillin 이 penicillin 만큼 효과적이고 맛이 더 좋다      | 경구 penicillin V, 근육주사 penicillin G benzathine; 소아에서는 경구 amoxicillin 이 penicillin 만큼 효과적이고 맛이 더 좋다    | 경구 penicillin V, 근육주사 penicillin G benzathine; 소아에서는 경구 amoxicillin 이 penicillin 만큼 효과적이고 맛이 더 좋다    | 자세한 기술 없음       |
| 페니실린 알레르기              | 4형 (발진 등): cephalosporin 등 사용<br>1형 (아나필락시스 등): 베타락탐 외 사용            | 아나필락스가 아닌 경우: 1세대 cephalosporin<br>아나필락시스인 경우: 베타락탐 금지, 베타락탐 외 사용 | 4형 과민반응: 1세대 cephalosporin (예: cephalexin)<br>1형 과민반응: clindamycin 혹은 clarithromycin 혹은 azithromycin   | 4형 과민반응: 1세대 cephalosporin (예: cephalexin)<br>1형 과민반응: clindamycin 혹은 clarithromycin 혹은 azithromycin | 4형 과민반응: 1세대 cephalosporin (예: cephalexin)<br>1형 과민반응: clindamycin 혹은 clarithromycin 혹은 azithromycin | 자세한 기술 없음       |

표 6. 급성 부비동염의 정의

| 용어          | 정 의                                                                                                                                                                                                                                                                      |
|-------------|--------------------------------------------------------------------------------------------------------------------------------------------------------------------------------------------------------------------------------------------------------------------------|
| 급성 부비동염     | 4주 이내의 농성비루와 코 막힘 이나 안면 통증 또는 두 증상 모두를 동반한 경우로 정의한다.<br>① 농성 비루는 바이러스성 상기도 감염에서 전형적으로 나타나는 맑은 분비물과는 다르게 탁하고 색깔을 띠고 있으며 환자나 의사의 신체 검진으로 관찰되는 소견이다.<br>② 코 막힘은 환자가 호소하는 코 막힘, 비출혈 등의 증상이나 의사의 신체 검진으로 관찰되는 소견이다.<br>③ 안면 통증은 전안부 및 안와 부위를 포함하거나 국소적이거나 전반적인 두통으로 나타날 수 있다. |
| 바이러스성 부비동염  | 바이러스에 의해 발생하거나, 바이러스에 의해 발생했다고 추정되는 급성 부비동염을 의미한다. 다음과 같은 소견이 있을 때 바이러스성 부비동염으로 진단한다.<br>급성 부비동염의 증상 또는 징후가 10일 미만으로 지속되고 악화 소견이 없을 때                                                                                                                                    |
| 급성 세균성 부비동염 | 세균에 의해 발생하거나, 세균에 의해 발생했다고 추정되는 급성 부비동염을 의미한다. 다음과 같은 소견이 있을 때 급성 세균성 부비동염으로 진단한다.<br>① 상기도 증상 시작 후 10일 혹은 그 이후에도 급성 부비동염의 증상 혹은 징후가 있을 때<br>② 또는, 초기 호전 후 10일 이내에 급성 부비동염의 증상 혹은 징후가 악화 소견을 보일 때 (double worsening)                                                     |

염의 약 85%는 항생제 치료 없이 7-15일 이내에 증상이 호전된다 [104]. 하지만, 부비동은 원래 정상적으로 세균이 분리되지 않는 무균 부위이며, 급성 세균성 부비동염의 일부가 세균성 뇌수막염, 뇌농양, 안구 주위 조직 감염 등의 심각한 합병증을 유발할 수 있고, 만성 부비동 질환과의 연관성을 완전히 배제할 수 없으므로 [105], 일반적으로 항생제 치료가 필요하다[106]. 실제로 급성 지역사회획득 세균성 부비동염에서 적절한 항생제 치료를 시행하면 부비동의 세균율이 90% 이상으로 부적절한 항생제 치료군보다 더 우수하였다 [106]. 하지만, 불필요한 항생제 투약은 항생제 내성을 상승시키고, 약물 부작용을 증가시켜 의료 비용의 상승을 야기하므로, 임상 현장에서는 바이러스성과 세균성 급성 부비동염을 구분하는 노력이 요구된다 [106].

비록 급성 부비동염에서 발생하는 코막힘, 비루, 재채기, 코가려움증 등의 임상 증상 이외에 진단을 위해 사용하는 진찰소견, 영상소견 및 검사실 소견 사이의 일치율마저 매우 낮아 임상 현장에서 세균성 급성 부비동염을 바이러스 감염과 구별하는 것은 매우 힘들다 [105, 107]. 그럼에도 불구하고, 임상의들은 부비동염을 시사하는 증상 및 징후뿐 아니라 전형적인 발병 양상과 시간에 따른 증상 변화를 근거로 바이러스성과 세균성을 구분하려는 노력을 기울여야 한다 [108].

급성 세균성 부비동염의 진단을 위해 부비동의 흡입 천자 배양을 시도할 수 있으나, 침습적인 방법으로 임상 현장에서 실제로 시행하기 어려워 일반적으로 임상적 진단을 하는 경우가 많다. 급성 세균성 부비동염의 임상적인 진단은 일반적으로 7일 정도의 경과 관찰이 요구되며, 그기간 중 농성 비루, 편측 상악 부위 치통이나 안면통 발생, 편측 상악동의 압통, 초기 호전 후 다시 악화되는 경우 영상학적 검사가 임상적 진단에 도움이 될 수 있다 [4, 108]. 한편, 미국감염학회 진료 지침에 따르면, 급성 세균성 부비동염은 보통 임상 증상의 호전 없이 10일 이상 증상 및 징후가 지속되며, 발병 후 3-4일 이상 39°C 이상의 발열, 화농성 비루 및 얼굴 부위 압통 등의 심한 증상 및 징후가 발생한다. 혹은 급성 바이러스성 상기도 감염 증상이 5-6일 지속된 후 호전되던 중, 다시 새롭게 발열, 두통, 비루 증가 등 악화 소견 (double

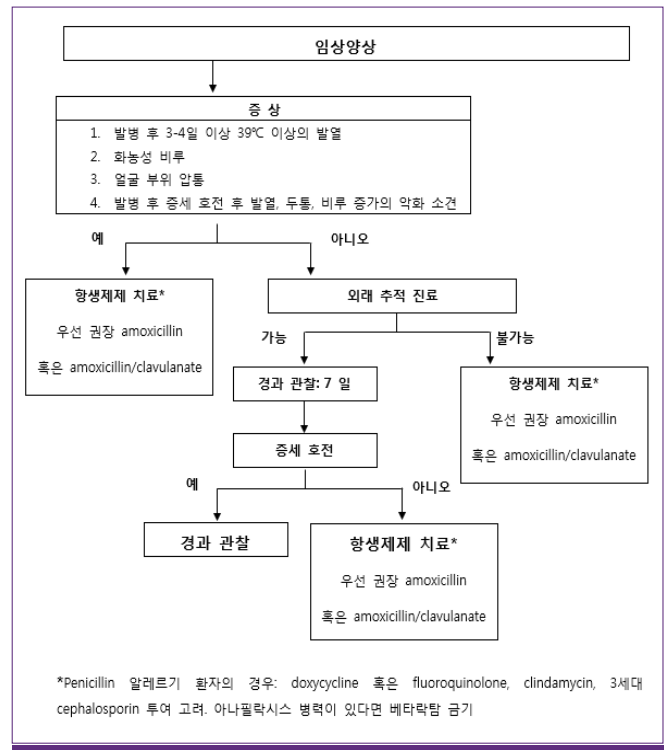

그림 3. 급성 세균성 부비동염에서 초기 경험적 항생제 사용의 흐름도.

sickening)이 시작되면 급성 세균성 부비동염을 의심하여 항생제 투약이 권고된다 [108]. 그 밖에 분비물에 악취가 동반되면 혐기성 세균이 의심되며 치아 감염의 가능성을 평가하면서 항생제를 투약한다.

앞선 무작위 대조연구들을 종합하여 보면 항생제를 7일에서 15일 사용한 군은 호전률이 91%로 위약군 (placebo group) 86%에 비하여 높았으며, 급성 세균성 부비동염의 통증기간과 이환기간은 초기 치료 여부와의 상관관계가 밝혀지지 않았다 [94, 96]. 따라서, 급성 세균성 부비동염 환자에서 합병증을 동반하지 않은 경우에도 초기 진료



시 바로 항생제를 처방할 수 있으나, 경우에 따라 초기 항생제 치료를 연기하고 경과 관찰 (watchful waiting)할 수 있다. 다만, 초기 항생제 치료를 연기하는 경우는 환자의 추후 외래 진찰을 확인할 수 있는 경우로만 국한한다 [94]. 급성 세균성 부비동염 진단 후 항생제 치료 없이 적절한 증상 완화를 위한 치료에도 불구하고 7일이내 증상의 호전이 없거나, 증상 완화 치료 중 증상의 악화를 보이는 경우는 경험적 항생제 치료를 시작한다 [109, 110]. 39°C 이상의 고열이나 3-4일간 지속된 안면 통증 또는 농성 비루는 중증의 급성 세균성 부비동염을 시사하는 증상 또는 소견으로 경험적 항생제 치료를 시작한다 (그림 3) [108, 111-114].

7) 급성 세균성 부비동염의 초기 경험적 항생제 사용시 1차 선택약으로 권고되는 항생제는 무엇인가?

1. 성인의 급성 세균성 부비동염에서, amoxicillin 혹은 amoxicillin/clavulanate가 초기 경험적 항생제로 우선 권고되는 1차 선택약이다 (근거수준 높음, 권고강도 강함).
2. Penicillin-resistant *S. pneumoniae*의 발생률이 높은 지역, 심한 증상, 고령, 최근 입원력, 1개월 이내의 항생제 사용력, 면역 저하자의 경우, 고용량의 amoxicillin 혹은 amoxicillin/clavulanate 사용을 고려한다 (근거수준 중등도, 권고강도 강함).
3. Penicillin 알레르기 환자의 경우: 4형 (발진 등) 알레르기 경우 사용시 doxycycline 혹은 fluoroquinolone, 3세대 cephalosporin, clindamycin의 투여를 고려할 수 있다. 1형 (anaphylaxis 등) 알레르기의 경우 모든 베타락탐 항생제 (cephalosporin 등)는 사용하지 않는다. 베타락탐 외의 항생제를 투여하여야 한다 (근거수준 높음, 권고강도 강함).
4. 경험적 항생제 사용기간은 중증의 급성 부비동염이 아닌 경우, 5-10일 이내 또는 증상/징후 호전 후 4-7일의 짧은 사용을 고려한다 (근거수준 높음, 권고강도 강함).

급성 세균성 부비동염에서 올바른 항생제 선택을 위해 먼저 주요 원인균과 항생제 감수성을 고려해야 한다. 급성 세균성 부비동염의 원인균에 대한 국내 역학 자료는 없으나, 외국 자료에 따르면 *S. pneumoniae*, *H. influenzae*, *M. catarrhalis*, *S. aureus*가 가장 흔하며, 특

히, *S. pneumoniae*와 *H. influenzae*가 전체 분리주의 약 75%를 차지한다 [102, 103]. 하지만, 국내에서도 점차 폐렴구균 백신 접종률이 증가하면서 원인균에 대한 역학 변화가 예상된다 [115]. 미국에서 1999년부터 2000년까지 부비동염으로 일차 의료기관을 방문한 환자에서 분리한 임상 분리주에서 *S. pneumoniae*의 penicillin, azithromycin, levofloxacin에 대한 감수성은 각각 65%, 64.7%, 99.8%였으며, *H. influenzae*는 azithromycin과 levofloxacin에 대한 감수성이 각각 99.4%와 100%로 확인되었다 [103].

급성 부비동염의 초기 경험적 항생제 중 1차 약제에 관한 연구는 2개의 무작위 대조연구와 1개의 체계적 문헌 고찰이 있다. 보고에 따르면 방사선 검사상 혹은 균 동정상 급성 부비동염으로 진단된 환자에서, amoxicillin, cefuroxime axetil, amoxicillin/clavulanate, levofloxacin, moxifloxacin, clarithromycin 등 여러 항생제 간 임상적 치료 효과의 차이가 없음이 보고되었다 [116-118]. 특히, amoxicillin 혹은 amoxicillin/clavulanate 제제의 안전성, 효율성, 가격, 좁은 항균범위 (narrow microbiologic spectrum)를 고려할 때 [108, 111, 119], 급성 부비동염에 대한, 초기의 경험적 항생제는 amoxicillin 혹은 amoxicillin/clavulanate (하루에 amoxicillin 500 mg/clavulanate 125 mg을 3회 복용 혹은 amoxicillin 875 mg/clavulanate 125 mg을 2회 복용)의 사용을 먼저 고려하여야 한다 (표 7) [108, 111]. 또한 beta-lactamase 생성 *H. influenzae* 등의 항생제 내성 균주를 의심할 수 있는 상황이나 [120], 중등도에서 중증의 감염소견을 보이는 경우, 만성질환이나 면역 관련질환, 고령의 경우 amoxicillin/clavulanate 제제가 amoxicillin 단독 제제에 비해 우선될 수 있다 [121]. 한편, *M. catarrhalis*에 의한 세균성 급성 부비동염이 소아보다 성인에서 발생 가능성은 낮지만, *M. catarrhalis*는 amoxicillin에 모두 내성인 반면 amoxicillin/clavulanate에는 감수성이 있다.

고용량의 amoxicillin (90 mg/kg/day) 혹은 amoxicillin/clavulanate (amoxicillin 2 g 혹은 90 mg/kg/day 2회 복용) 사용을 고려하는 경우는 다음과 같다: 1) penicillin-resistant *S. pneumoniae*의 발생률이 높은 지역 (endemic rate>10%)에 사는 환자, 2) 39°C 이상의 고열, 화농성 합병증 발생 가능성이 있는 경우 등의 심한 증상, 3) 65세 이상, 4) 최근 입원한 병력이 있는 환자, 5) 최근 1개월 이내 항생제 사용력이 있는 환자, 6) 면역력 저하자 등에 해당하는 경우, 고용량의

표 7. 급성 부비동염에서 사용될 수 있는 경구 항생제

| 항생제         |                         | 성인 용량                          |
|-------------|-------------------------|--------------------------------|
| Preferred   | Amoxicillin             | 500-875 mg을 하루 2번              |
|             | Amoxicillin/clavulanate | 500mg 하루 세번 또는 875mg 하루 두번     |
| Alternative | Cefpodoxime proxetil    | 200 mg을 하루 2번                  |
|             | Cefdinir                | 300 mg을 하루 2번 또는 600 mg을 하루 한번 |
|             | Cefuroxime              | 250-500 mg을 하루 2번              |
|             | Levofloxacin            | 500 mg을 하루 한번                  |
|             | Moxifloxacin            | 400 mg을 하루 한번                  |

amoxicillin 혹은 amoxicillin/clavulanate를 고려할 수 있다 [94, 108, 122-125].

Penicillin 알레르기 환자의 경우, 4형 (발진 등) 알레르기 경우에는 doxycycline 혹은 fluoroquinolone, 3세대 cephalosporin, clindamycin의 투여를 고려할 수 있다. 1형 (anaphylaxis 등) 알레르기의 경우 모든 베타락탐 항생제 (cephalosporin 등)는 사용하지 않는다 [94]. 베타락탐 외 항생제 (doxycycline, clindamycin, fluoroquinolone 등)를 투여하여야 한다 [94]. 메타분석 결과에 따르면, penicillin 알레르기가 없는 환자에서 fluoroquinolone의 사용은 beta-lactam 계열 항생제의 사용보다 치료 성공률이 각각 87%와 86%로 임상적 효과는 차이가 없으나, 부작용 발생이 더 높다는 보고가 있다 [126]. Macrolide와 trimethoprim/sulfamethoxazole은 외국의 보고에서 급성 부비동염의 주요 원인균에 해당하는 *S. pneumoniae*, *H. influenzae*에 높은 내성을 보이는 것으로 보고되었다 [102, 103, 121, 127].

일반적으로 합병증을 동반하지 않은 성인 세균성 급성 부비동염에서 1차의 경험적 항생제 투약 기간은 5-10일 이내 또는 증상/징후 호전 후 4-7일로 권고된다 [94, 108, 128]. 방사선 검사상 급성 부비동염으로 진단된 환자를 대상으로 항생제 투여기간을 연구한 12개의 무작위 대조연구의 문헌고찰에 따르면, 3-7일간의 짧은 기간 항생제를 투여한 군과 6-10일 이상의 긴 기간 항생제를 투여한 군에 치료 성공에 있어 통계적으로 유의한 차이를 보이지 않았다 [122]. 항생제 사용 그룹은, 사용하지 않은 그룹에 비하여 10-12%이상 약물 이상반응의 빈도가 높았다. 또한 특히 10일 이상의 장기간 항생제를 투여한 군에서 그렇지 않은 군에 비해 약물 이상반응의 빈도가 높았다 [116, 123]. 또한 소아 치료지침에서와 같이, 약물반응이 느린 환자의 경우에서 약물 투여 후 증상이 소실되었다 하더라도 이후 4-7일간의 항생제 추가 투여를 고려할 수 있다 [129]. 따라서, 1차의 경험적 항생제는 39°C 이상의 발열이 있거나 화농성 합병증 발생 가능성이 있는 경우의 중증의 급성 부비동염이 아닌 경우, 5-10일 이내 또는 증상/징후 호전 후 4-7일의 짧은 사용을 권고한다 [94, 108, 128].

8) 급성 세균성 비부비동염 성인 중 1차 항생제 치료 실패 혹은 중증 세균성 비부비동염 시 2차 항생제는 언제 사용되어야 하는가?

1. 초기 경험적 항생제 치료에도 72시간내 증상이 더 악화되거나 3-5일 이후에도 상태호전이 없는 환자에 있어 2차 항생제 사용을 고려할 수 있다 (근거수준 중등도, 권고강도 강함).
2. 영상 검사, 미생물 배양 및 항생제 감수성 검사를 통해 환자를 재평가 한다 (근거수준 매우 낮음, 권고강도 강함).
3. 원인균에 대한 미생물 배양 및 감수성 검사가 어려울 경우, 다약제 내성 (Multi-drug resistant) *S. pneumoniae*나 beta-lactamase를 생산하는 *H. influenzae*, *M. catarrhalis*를 치료할 수 있는 항생제 (high-dose amoxicillin/clavulanate, fluoroquinolone, doxycycline, clindamycin과 3세대 cephalosporin 병합요법)를 사용한다 (근거수준 중등도, 권고강도 강함).

4. 입원치료를 받을 정도로 증세가 심할 경우 ampicillin/sulbactam, ceftriaxone, cefotaxime, levofloxacin, moxifloxacin 등의 약제를 사용할 수 있다 (근거수준 중등도, 권고강도 강함).
5. 국내에서 급성 세균성 비부비동염 치료를 위한 2차 치료 항생제의 선택은 다음의 내용을 고려하여 결정되어야 한다: 국내의 급성 세균성 비부비동염의 원인균주 유행률, 국내의 항생제 내성균주의 유행률, 급성세균성 비부비동염의 대표적 원인균주 3가지에 대한 항균력 (*S. pneumoniae*, *H. influenzae*, *M. catarrhalis*), 개별항생제의 특성 (예, 용량, 약효지속시간 부작용 등) (근거수준 매우 낮음, 권고강도 강함)

초기 치료 시작 후 72시간 이내 증상이 악화하였거나, 3-5일 까지 증상이 호전되지 않으면, 1) 진단의 적합성, 2) 비감염성 원인, 3) 내성균, 4) 구조적 문제 동반 여부를 고려하여 재평가가 하여야 한다. 재평가 하는 경우 PNS 단순 X선 촬영, CT/MR 등의 영상 검사나 미생물 배양 및 항생제 감수성 검사를 시행할 수 있으며, 미생물 배양 검사는 부비동 천자에 의한 방법이 좋으나, 비내시경 하중비도에서의 미생물 배양검사로 대체할 수도 있다 [94, 108]. 비인두 면봉도말 검체를 이용한 배양검사는 추천하지 않는다 [94, 108].

재평가 후 급성 세균성 비부비동염에 해당한다면 초기치료로 경과관찰을 선택한 경우, 항생제 치료를 시작하고 항생제를 복용 중이었던 환자는 항생제를 변경한다 [94, 108]. 원인균에 대한 미생물 배양 및 항생제 감수성 검사 결과에 따라 항생제를 선택하는 것이 좋으나, 경험적 항생제를 사용하여야 하는 경우 다약제 내성 (multi-drug resistant) *S. pneumoniae*나 beta-lactamase를 생산하는 *H. influenzae*, *M. catarrhalis*를 치료할 수 있는 항생제 1) high-dose amoxicillin/clavulanate, 2) doxycycline, 3) clindamycin과 3세대 cephalosporin 병합요법 등을 사용한다 [108, 116].

초기 경험적 항생제 치료가 실패하여 2차 항생제를 선택할 경우 아래의 내용을 고려해야 하나, 초기치료로 저용량 amoxicillin/clavulanate을 투약하였을 경우에는 2차 항생제로 고용량 amoxicillin/clavulanate를 사용할 수 있다 [108, 116]. 2세대 cephalosporin인 cefaclor와 cefprozil은 급성 세균성 비부비동염의 대표적 원인균주 *S. pneumoniae*, *H. influenzae*, *M. catarrhalis*의 항생제 감수성 저하로 치료 효과가 떨어지므로 추천되지 않는다 [108, 130-133]. 경구 항생제인 경우 cefditoren과 cefcapene은 penicillin-resistant *S. pneumoniae*에 의한, cefpodoxime은 *H. influenzae*, *M. catarrhalis*에 의한 급성 세균성 비부비동염에 효과적이라는 보고가 있다 [116, 132-135]. 경구 cefuroxime과 cefdinir는 penicillin 중등도 내성 *S. pneumoniae*, *H. influenzae*, *M. catarrhalis*에 의한 급성 세균성 비부비동염에 효과적으로 알려져 있으나 국내의 경우 penicillin-resistant *S. pneumoniae* 비율이 높아 치료 효과가 불확실하다 [136, 137]. 혐기성균에 대한 항균스펙트럼을

넓히기 위해 cephalosporin 사용시 metronidazole 또는 clindamycin 추가가 권유되기도 한다 [108].

Fluoroquinolone인 gatifloxacin, levofloxacin, moxifloxacin 등은 효과적일 수 있으나 결핵균과 *S. pneumoniae* 등에서 내성 발생 가능성에 유의해야 한다. 이외 2016년 FDA 에서 부비동염, 기관지염, 합병증이 없는 요로감염에서 fluoroquinolone의 사용은 다른 치료 대안이 없을 경우에만 사용하도록 권고하였다는 것을 유의할 필요가 있다 [1, 6, 138].

Doxycycline은 캐나다 및 영국 연구에 의하면 *S. pneumoniae*, *H. influenzae*, *M. catarrhalis*에 대한 약제 감수성이 모두 90% 이상이라는 보고가 있으며 [139-141], 성인의 급성 세균성 비부비동염에 대한 amoxicillin/clavulanate을 이용한 초기 경험적 항생제 치료를 견디기 어렵거나 실패한 경우 fluoroquinolone 대안으로 2차 항생제로 사용할 수 있다 [108]. 이는 doxycycline의 약동력학의 우수성과 지역사회 폐렴으로 입원한 환자들에 있어 doxycycline과 levofloxacin의 임상적 효과의 차이가 없었고, 오히려 doxycycline 치료 환자에서 비용 감소가 확인되었기 때문이다 [142, 143].

Macrolide인 erythromycin, roxythromycin, azithromycin, clarithromycin은 국내에 macrolide-resistant *S. pneumoniae*의 비율이 높아 (80-90%) 치료효과가 불확실하다는 의견이 있으며 Ketolide 계열인 telithromycin의 경우 macrolide-resistant *S. pneumoniae*에 대해서도 항균력을 가진다고 알려져 있으나 국내에서 아직 사용이 어렵다 [108, 136, 137, 144].

입원치료를 받을 정도로 중증이 심한 급성 부비동염의 경우, ampicillin/sulbactam (1.5-3g, 6시간마다 주사), ceftriaxone (1-2g, 1-2회 분할 주사), cefotaxime (1-2g, 6-8시간마다 주사), levofloxacin (500-750mg, 경구/주사), moxifloxacin (400mg, 경구) 등과 같은 항생제를 사용할 수 있다. 정주용 ceftriaxone과 cefotaxime 은 penicillin에 내성을 갖는 *S. pneumoniae*를 포함하는 모든 *S. pneumoniae*에 작용을 하는 것으로 알려져 있다 [124]. 또한 clindamycin과 3세대 cephalosporin 병합요법에서 clindamycin에 대한 내성이 *S. pneumoniae* serotype 19A의 경우, 최대 31%까지 보고되고 있어, 입원을 요하는 중증의 환자의 경우, levofloxacin, moxifloxacin을 권고한다 [127].

적절한 항생제 사용에도 48-72시간동안 증상 호전 없이 악화되거나 안구 및 중추신경계로의 합병증 의심 시 추가 검사 및 수술적 치료가 고려될 수 있다 [145]. 치료기간은 임상적으로 증상이 없어진 후 4-7일간 더 항생제를 투약하는 것으로 알려져 있으며 총 치료기간은 대개 10-14일 이하이다.

건강보험 심사평가원의 고시에서는 급성 세균성 비부비동염에 대한 항생제 치료에 대해 다음을 제시하고 있다: 1) 항생제 사용의 일반 원칙 (고시 제 2013-127호), 전반적인 감염증에 사용하도록 되어 있고, 실제 임상에서 항생제 선택 시에는 적응증별 선택보다 약제감수성 검사에 따라 선택하고 있으므로 환자의 병력 등을 참조하여 허가사항 범위 내에서 1차 약제부터 단계적으로 사용해야 함. 중

증 감염증에는 경구 투약만으로 치료효과를 기대할 수 없는 경우 주사제와 병용하여 처방 투여 할 수 있음.

9) 1차 혹은 2차의 초기 경험적 항생제 치료에도 72시간내 증상이 더 악화되거나 3-5일 이후에도 상태호전이 없는 환자에 있어, 권고되는 치료전략은 무엇인가?

1. 적절한 1차 혹은 2차의 약물치료에도 호전을 보이지 않는 경우나 재발성 급성 부비동염의 경우, 알레르기 유무나 면역계통의 이상, 치아감염 등을 고려하여 추가 진단하는 것이 권고된다 (근거수준 매우 낮음, 권고강도 강함).
2. 연관된 동반질환이 진단된 경우 동반질환을 각 질환의 지침에 맞게 치료한다. 알레르기 양성일 경우, 환자에 따라 환경요법, 면역치료, 약물치료 등을 고려한다 (근거수준 매우 낮음, 권고강도 강함).
3. 재발성 급성 부비동염에서 적절한 약물치료 후 반응이 없을 경우, 수술적 치료를 고려할 수 있다 (근거수준 중등도, 권고강도 강함).

항생제를 비롯하여 적절한 1, 2차의 약물치료를 하였음에도 호전을 보이지 않는 경우나, 질병 이환기간 사이에 부비동염의 증상을 보이지 않는 1년에 4회이상 발병하는 것으로 정의되는 급성 부비동염의 경우 [146], 환자에서 알레르기 유무나 면역계통의 이상, 치아감염 등을 고려하는 감별 진단이 권고된다. 지속적으로 반복되는 급성 부비동염의 경우 수술적 치료를 고려할 수 있다 [147].

체계적 문헌고찰에 따르면, 재발성 급성 부비동염이나 만성 부비동염의 경우 알레르기 검사를 고려할 수 있다 [148]. 알레르기 환자의 경우 비강과 부비동 점막의 부종에 의하여 자연공이 폐쇄되어 자연공의 수가 많은 사골동등이 질환에 이환될 수 있으며, 비용을 형성할 수 있다. 만약 알레르기 양성일 경우, 환자에 따라 환경요법, 면역치료, 약물치료 등을 고려한다. 다만 환경요법과 면역치료가 재발성의 급성 부비동염이나 만성 부비동염의 임상적 결과를 호전시키는지는 근거가 제한적이다 [149, 150].

천식은 재발성 급성 부비동염이나 만성 부비동염과 밀접한 연관이 있는 질환으로, 잦은 재발의 원인이 된다 [151]. 항체결핍증과 같은 면역결핍이 진단된 경우, 예방적 항생제의 사용, 폐렴구균 백신 접종 및 주기적 정맥용 IgG 주사 등의 치료를 고려할 수 있다 [151]. 이외에도 상악 대구치와 소구치의 충치나 발치, 외상, 영양결핍이나 장기간의 스테로이드 치료, 당뇨 등의 전신상태 저하, 비강, 부비동의 종양 등에 의하여도 발생 가능하므로, 의심될 경우 이에 대한 검사가 필요할 수 있다.



10) 급성 세균성 부비동염이 의심되는 환자를 언제 해당과 전문의에게 전원하여야 하는가?

1. 적절한 치료에도 불구하고 증상의 호전이 나타나지 않거나, 반복적인 염증이 나타나는 경우에는 염증을 유발하는 원인 감별을 위해 비강내시경검사 및 영상 촬영 등 정밀 검사를 요하며 해당 전문의에게 의뢰하여야 한다 (근거수준 매우 낮음, 권고강도 약함).
2. 급성 비부비동염의 안와 혹은 두개 내 합병증이 의심될 때에는 즉시 해당 전문의에게 의뢰하여야 한다 (근거수준 매우 낮음, 권고강도 강함).

급성 비부비동염 치료로 항생제 사용 3-5일 이후에도 증상의 호전이 없거나 악화되는 경우 치료 실패로 판단하는데, 2차 항생제까지 사용했음에도 불구하고 치료 효과가 없을 시에는 원인 감별이 필요

하다. 또한 질환이 발생한 후 완치 되었다가 다시 발병하는, 반복적인 비부비동염이 1년에 4회 이상 발생할 경우에도 원인 감별이 필요하다고 할 수 있다 [108].

감별해야 할 원인에는 만성 비부비동염, 알레르기비염, 비강 내 비정상적인 해부학적 구조, 면역저하, 진균 감염, 육아종, 그리고 종양 등이 있다. 정확한 원인 감별 및 적절한 치료를 위해서는 비강내시경검사 및 필요 시 CT, MRI 등의 영상학적 정밀 검사를 시행할 수 있는 전문의에게 의뢰하여야 한다 [152].

비부비동은 양 옆으로는 안와, 위로는 두개저와 인접해 있으며, 따라서 비부비동의 염증이 안와 및 두개 내로 퍼져 연조직염, 뇌막염, 농양 등 치명적인 질환을 유발할 수 있다 [153]. 적절한 항생제 투여 및 외과적 배농이 이루어지지 않을 경우 실명이나 뇌손상 뿐만 아니라 심하면 사망에까지 이를 수 있다 [154, 155].

급성 비부비동염 환자에서 심한 안구 통증, 눈 주위 부종, 안구 운동

표 8. 급성 부비동염의 진단 및 항생제 치료에 대한 주요 진료지침의 비교

| 항목             | 본 지침                                                                                                                                                      | 미국감염학회 (2012)                           | 미국이비인후과학회 (2015)                                                        | 한국 소아 급성 상기도 감염의 항생제 사용지침 (2016)                                      | 미국소아과학회 (2013)                                      |
|----------------|-----------------------------------------------------------------------------------------------------------------------------------------------------------|-----------------------------------------|-------------------------------------------------------------------------|-----------------------------------------------------------------------|-----------------------------------------------------|
| 급성세균성 부비동염의 진단 | 다음 증상/징후 중 1가지 이상<br>1. 심한 발병: 39°C 이상의 발열, 농성 비루, 안면통증 (≥3일)<br>2. 지속적인 증상: 콧물, 낮 시간의 기침 (≥10일)<br>3. 악화되는 경과: 상기 증상들이 호전 보이던 중 새로 발생하는 발열, 두통, 기침 또는 콧물 |                                         |                                                                         |                                                                       |                                                     |
| 영상 검사          | 부비동염의 원인 감별을 위하여 X ray 촬영은 권장되지 않으며, 안구 또는 중추신경계 합병증이 의심되는 경우 부비동 CT 또는 MRI 촬영을 권장                                                                        |                                         |                                                                         |                                                                       |                                                     |
| 항생제 필요한 경우     | 급성 세균성 부비동염으로 진단된 경우 항생제 치료를 초기 처방 가능                                                                                                                     | 임상적으로 세균성 부비동염을 진단하면 항생제 처방             | 항생제 사용 없이 외래 추적하여 경과 관찰하거나 합병증 동반하지 않은 급성 세균성 부비동염의 경우 항생제 치료를 초기 처방 가능 | 심한 발병, 또는 경과 악화 시 항생제 처방 지속적인 증상을 보이는 경우는 항생제를 즉시 처방하거나 3일 경과 관찰 중 선택 |                                                     |
| 1차 선택 항생제      | 표준용량 또는 고용량의 amoxicillin 또는 amoxicillin/clavulanate                                                                                                       | 표준용량 또는 고용량의 amoxicillin/clavulanate    | 표준용량 또는 고용량의 amoxicillin 또는 amoxicillin/clavulanate                     | 표준용량 또는 고용량의 amoxicillin/clavulanate                                  | 표준용량 또는 고용량의 amoxicillin 또는 amoxicillin/clavulanate |
| 페니실린 알레르기      | 4형 (발진 등) doxycycline 혹은 cephalosporin, clindamycin 고려<br>1형 (anaphylaxis 등) 베타락탐 외의 항생제를 투여                                                              | 3세대 세파계열도 사용가능 (단, 1형 페니실린 과민반응이 아닌 경우) |                                                                         | 3세대 세파계열도 사용가능                                                        |                                                     |
| 항생제 사용기간       | 5-10일 이내 또는 증상/징후 호전 후 4-7일 (1차 경험적 항생제)                                                                                                                  | 합병증이 없는 경우 성인 5-7일 (소아 10-14일)          | 5-10일                                                                   | 총 10-28일, 또는 증상/징후 호전 후 7일                                            |                                                     |
| 재평가            | 치료 시작 72시간 이내 증상 호전 없이 악화나 새로운 증상/징후가 생길 경우 초기 치료의 재평가가 필요함                                                                                               |                                         |                                                                         |                                                                       |                                                     |



장애, 안구 돌출, 결막 화농증, 시력 감소 등이 있을 경우 안와 합병증을 의심할 수 있으며, 고열, 심한 두통, 뇌수막 자극 소견 (meningeal irritation sign), 정신 이상 등이 있을 경우 두개 내 합병증을 의심할 수 있다. 이러한 경우 즉시 해당과 전문의에게 의뢰하여야 한다 [128].

본 지침에서의 권유와 급성 부비동염에 대한 주요 진료지침 [미국 감염병학회 (2012), 미국이비인후과학회 (2015), 미국소아과학회 (2013), 한국 소아 급성 상기도 감염의 항생제 사용지침 (2016)]의 권유의 비교는 표 8과 같다 [89, 94, 108, 156].

## IV. 맺음말

### 1. 본 임상 진료 지침 제한점 및 향후 추가되어야 할 내용

급성 상기도 감염이 매우 흔한 질환임에도 불구하고, 이 분야의 연구는 근거 중심적 측면에서 좋은 연구가 매우 드물다. 또한 이 지침의 권고 근거가 되는 대부분의 임상 연구들은 국외에서 수행된 것으로서 국내 환자와 관련된 충분한 연구 결과가 없는 상황에서 국외의 연구 결과들을 토대로 마련되었으므로, 이를 임상에서 적용할 때 이러한 사항이 충분히 고려되어야 한다. 따라서, 적절한 국내 지침 개정을 위해서는, 향후 국내 자료의 축적을 위해 국내 대상자들에 대한 연구가 반드시 필요하다.

첫째, 국내 성인에서 발생하는 급성 상기도 감염의 원인 미생물의 규명이 필요하다. 계절에 따른 바이러스 및 세균의 종류와 구성비의 차이를 조사하여 불필요한 항생제 사용 빈도를 낮추는 노력이 필요하다. 둘째, 세균성 급성 상기도 감염에서 분리된 다양한 세균의 항생제 감수성 양상을 근거로 적절한 경험적 항생제를 선택할 수 있는 자료를 확보해야 한다. 셋째, 국내 성인에서 인두도말 검체를 이용한 신속항원 검사 및 배양 검사의 수행능을 분석하고, 비부비동관 관련 검체 배양 검사의 유용성 평가가 요구된다. 그 밖에 해당 검사와 ASO, C-반응 단백질, 프로칼시토닌 검사가 치료 결과에 미치는 영향을 평가하여 실제 임상 현장에서 활용 가능한 진단 흐름도 개발의 근거자료를 마련해야 한다. 넷째, 국내 환자를 대상으로 해외 진료 지침에서 1차 약제로 권고되는 amoxicillin과 amoxicillin/clavulanate의 치료 효과를 평가하고, 이 두 약제의 비교 분석 및 용량과 투약 기간에 대한 국내 자료가 필요하다. 끝으로 본 임상 지침에 대한 의료진의 순응도 평가를 통해 임상 지침의 활용도를 가능할 수 있고 순응 저해 요인을 분석하여 향후 지침 개정에 응용하는 것이 필요하다. 또한, 심사평가원의 보험 청구 자료 등을 활용하여 항생제 처방 양상과 권고 항생제를 비교 분석하는 것도 급성 상기도 감염증에서 항생제 오남용을 낮출 수 있는 기본 자료를 제시할 것으로 기대한다.

### 2. 이해 관계의 상충 (conflict of interest)

질병관리본부의 정책연구용역사업을 통해 본 지침을 제정하였으

나, 질병관리본부는 임상진료지침 내용 개발에 관여하지 않았다. 지침 작업에 참여한 제정위원회는 개발 과정 중 정부기관, 제약회사, 병원단체 및 이익단체로부터 어떠한 영향도 받지 않았음을 밝힌다.

### 3. 지침 개정에 대한 계획

본 지침은 향후 국내외의 주요 최근 연구 결과들을 반영하여 국내 실정에 적합한 지침이 되도록 주기적으로 개정할 예정이다.

## References

1. Johnston S, Holgate S. Epidemiology of viral respiratory infections. In: Myint S, Taylor-Robinson D, eds. Viral and other infections of the human respiratory tract. London: Chapman & Hall; 1996;1-38.
2. Fendrick AM, Monto AS, Nightengale B, Sarnes M. The economic burden of non-influenza-related viral respiratory tract infection in the United States. Arch Intern Med 2003;163:487-94.
3. Kirkpatrick GL. The common cold. Prim Care 1996;23:657-75.
4. Kim SW. Upper respiratory infections in adults. J Korean Med Assoc 2010;53:10-9.
5. Wessels MR. Streptococcal pharyngitis. N Engl J Med 2011;364:648-55.
6. Ebell MH, Smith MA, Barry HC, Ives K, Carey M. Does this patient have strep throat? JAMA 2000;284:2912-8.
7. Wilson JF. In the clinic. Acute sinusitis. Ann Intern Med 2010;153:ITC31-15; quiz ITC316.
8. Chiappini E, Regoli M, Bonsignori F, Sollai S, Parretti A, Galli L, de Martino M. Analysis of different recommendations from international guidelines for the management of acute pharyngitis in adults and children. Clin Ther 2011;33:48-58.
9. Kim SW. Bacterial upper respiratory infections. Infect Chemother 2011;43:383-9.
10. Kocher JJ, Selby TD. Antibiotics for sore throat. Am Fam Physician 2014;90:23-4.
11. Shulman ST, Bisno AL, Clegg HW, Gerber MA, Kaplan EL, Lee G, Martin JM, Van Beneden C. Clinical practice guideline for the diagnosis and management of group A streptococcal pharyngitis: 2012 update by the Infectious Diseases Society of America. Clin Infect Dis 2012;55:1279-82.
12. Gerber MA, Baltimore RS, Eaton CB, Gewitz M, Rowley AH, Shulman ST, Taubert KA. Prevention of rheumatic fever and diagnosis and treatment of acute Streptococcal

- pharyngitis: a scientific statement from the American Heart Association Rheumatic Fever, Endocarditis, and Kawasaki Disease Committee of the Council on Cardiovascular Disease in the Young, the Interdisciplinary Council on Functional Genomics and Translational Biology, and the Interdisciplinary Council on Quality of Care and Outcomes Research: endorsed by the American Academy of Pediatrics. *Circulation* 2009;119:1541-51.
13. Cooper RJ, Hoffman JR, Bartlett JG, Besser RE, Gonzales R, Hickner JM, Sande MA; American Academy of Family Physicians; American College of Physicians-American Society of Internal Medicine; Centers for Disease Control. Principles of appropriate antibiotic use for acute pharyngitis in adults: background. *Ann Intern Med* 2001;134:509-17.
  14. Little P, Stuart B, Hobbs FD, Butler CC, Hay AD, Delaney B, Campbell J, Broomfield S, Barratt P, Hood K, Everitt H, Mullee M, Williamson I, Mant D, Moore M; DESCARTE investigators. Antibiotic prescription strategies for acute sore throat: a prospective observational cohort study. *Lancet Infect Dis* 2014;14:213-9.
  15. Langlois DM, Andreae M. Group A streptococcal infections. *Pediatr Rev* 2011;32:423-9; quiz 430.
  16. Komaroff AL, Pass TM, Aronson MD, Ervin CT, Cretin S, Winickoff RN, Branch WT Jr. The prediction of streptococcal pharyngitis in adults. *J Gen Intern Med* 1986;1:1-7.
  17. Walsh BT, Bookheim WW, Johnson RC, Tompkins RK. Recognition of streptococcal pharyngitis in adults. *Arch Intern Med* 1975;135:1493-7.
  18. Centor RM, Witherspoon JM, Dalton HP, Brody CE, Link K. The diagnosis of strep throat in adults in the emergency room. *Med Decis Making* 1981;1:239-46.
  19. Dobbs F. A scoring system for predicting group A streptococcal throat infection. *Br J Gen Pract* 1996;46:461-4.
  20. McIsaac WJ, White D, Tannenbaum D, Low DE. A clinical score to reduce unnecessary antibiotic use in patients with sore throat. *CMAJ* 1998;158:75-83.
  21. McIsaac WJ, Kellner JD, Aufricht P, Vanjaka A, Low DE. Empirical validation of guidelines for the management of pharyngitis in children and adults. *JAMA* 2004;291:1587-95.
  22. Dagnelie CF, van der Graaf Y, De Melker RA. Do patients with sore throat benefit from penicillin? A randomized double-blind placebo-controlled clinical trial with penicillin V in general practice. *Br J Gen Pract* 1996;46:589-93.
  23. Zwart S, Sachs AP, Ruijs GJ, Gubbels JW, Hoes AW, de Melker RA. Penicillin for acute sore throat: randomised double blind trial of seven days versus three days treatment or placebo in adults. *BMJ* 2000;320:150-4.
  24. National Institute for Health and Clinical Excellence (NICE). Respiratory tract infections-antibiotic prescribing. London: NICE; 2008.
  25. McIsaac WJ, Goel V, To T, Low DE. The validity of a sore throat score in family practice. *CMAJ* 2000;163:811-5.
  26. Windfuhr JP, Toepfner N, Steffen G, Waldfahrer F, Berner R. Clinical practice guideline: tonsillitis I. Diagnostics and nonsurgical management. *Eur Arch Otorhinolaryngol* 2016;273:973-87.
  27. Gerber MA, Tanz RR, Kabat W, Dennis E, Bell GL, Kaplan EL, Shulman ST. Optical immunoassay test for group A beta-hemolytic streptococcal pharyngitis. An office-based, multicenter investigation. *JAMA* 1997;277:899-903.
  28. Dagnelie CF, Bartelink ML, van der Graaf Y, Goessens W, de Melker RA. Towards a better diagnosis of throat infections (with group A beta-haemolytic streptococcus) in general practice. *Br J Gen Pract* 1998;48:959-62.
  29. Roddey OF Jr, Clegg HW, Martin ES, Swetenburg RL, Koonce EW. Comparison of an optical immunoassay technique with two culture methods for the detection of group A streptococci in a pediatric office. *J Pediatr* 1995;126:931-3.
  30. Schlager TA, Hayden GA, Woods WA, Dudley SM, Hendley JO. Optical immunoassay for rapid detection of group A beta-hemolytic streptococci. Should culture be replaced? *Arch Pediatr Adolesc Med* 1996;150:245-8.
  31. Hart AP, Buck LL, Morgan S, Saverio S, McLaughlin JC. A comparison of the BioStar Strep A OIA rapid antigen assay, group A Selective Strep Agar (ssA), and Todd-Hewitt broth cultures for the detection of group A Streptococcus in an outpatient family practice setting. *Diagn Microbiol Infect Dis* 1997;29:139-45.
  32. Shin YJ, Jang SH, Dong ES, Ahn YM, Ku MS. Clinical manifestations of group A beta-hemolytic streptococcal pharyngitis and usefulness of rapid antigen test. *J Korean Pediatr Soc* 2001;44:732-40.
  33. Youn S, Chung HJ, Kim YH, Kim YH, Choi DJ, Lee SH, Min JS, Jung SY, Jung SK, Ahn BM, Lee HJ, Cha SH. Efficacy and cost benefits of rapid antigen detection test for group A streptococci obtained from acute pharyngitis in children. *Korean J Pediatr Infect Dis* 2005;12:124-34.
  34. Song SK, Hong MA, Oh KC, Ahn SI, Tae MH, Shin HJ, Chang JK, Cha SH. Comparison of two rapid antigen detection tests for diagnosis of group A streptococcal pharyngotonsillitis. *J Korean Pediatr Soc* 2002;45:973-9.
  35. Kim S. The evaluation of SD Bioline Strep A rapid antigen test in acute pharyngitis in pediatric clinics. *Korean J Lab*

- Med 2009;29:320-3.
36. Shet A, Kaplan EL. Clinical use and interpretation of group A streptococcal antibody tests: a practical approach for the pediatrician or primary care physician. *Pediatr Infect Dis J* 2002;21:420-6.
  37. Kaplan EL, Top FH Jr, Dudding BA, Wannamaker LW. Diagnosis of streptococcal pharyngitis: differentiation of active infection from the carrier state in the symptomatic child. *J Infect Dis* 1971;123:490-501.
  38. Johnson DR, Kurlan R, Leckman J, Kaplan EL. The human immune response to streptococcal extracellular antigens: clinical, diagnostic, and potential pathogenetic implications. *Clin Infect Dis* 2010;50:481-90.
  39. Christensen AM, Thomsen MK, Ovesen T, Klug TE. Are procalcitonin or other infection markers useful in the detection of group A streptococcal acute tonsillitis? *Scand J Infect Dis* 2014;46:376-83.
  40. Hjortdahl P, Melbye H. Does near-to-patient testing contribute to the diagnosis of streptococcal pharyngitis in adults? *Scand J Prim Health Care* 1994;12:70-6.
  41. Gulich M, Triebel T, Zeitler HP. Development and validation of a simple, two-step algorithm to identify streptococcal infection in adults with sore throat. *Eur J Gen Pract* 2002;8:57-61.
  42. ESCMID Sore Throat Guideline Group, Pelucchi C, Grigoryan L, Galeone C, Esposito S, Huovinen P, Little P, Verheij T. Guideline for the management of acute sore throat. *Clin Microbiol Infect* 2012;18 (Suppl 1):1-28.
  43. Kaplan EL, Johnson DR, Del Rosario MC, Horn DL. Susceptibility of group A beta-hemolytic streptococci to thirteen antibiotics: examination of 301 strains isolated in the United States between 1994 and 1997. *Pediatr Infect Dis J* 1999;18:1069-72.
  44. Sayyahfar S, Fahimzad A, Naddaf A, Tavassoli S. Antibiotic susceptibility evaluation of group A streptococcus isolated from children with pharyngitis: a study from Iran. *Infect Chemother* 2015;47:225-30.
  45. Chazan B, Raz R, Edelstein H, Kennes Y, Gal V, Colodner R. Susceptibility of group A streptococcus to antimicrobial agents in northern Israel: a surveillance study. *Microb Drug Resist* 2015;21:551-5.
  46. Varaldo PE, Debbia EA, Nicoletti G, Pavesio D, Ripa S, Schito GC, Tempera G. Nationwide survey in Italy of treatment of *Streptococcus pyogenes* pharyngitis in children: influence of macrolide resistance on clinical and microbiological outcomes. Artemis-Italy Study Group. *Clin Infect Dis* 1999;29:869-73.
  47. Cha S, Lee H, Lee K, Hwang K, Bae S, Lee Y. The emergence of erythromycin-resistant *Streptococcus pyogenes* in Seoul, Korea. *J Infect Chemother* 2001;7:81-6.
  48. Koh EH, Maeng KY, Kim S, Lee NY. A decrease in erythromycin resistance rate of *Streptococcus pyogenes* in 2004 in Jinju. *Korean J Clin Microbiol* 2006;9:51-7.
  49. Koo H, Baek S, Ma S, Lee H, Cha S. Trends of the incidence of erythromycin-resistant group A streptococci in Korea from 1998 through 2002. *Infect Chemother* 2004;36:75-82.
  50. Yi YH, Choi JH, Lee HK, Lee KJ, Bae SM, Yu JY, Kim KS. Characterization of erythromycin resistance of *Streptococcus pyogenes* isolated from pharyngitis patients in Korea. *Jpn J Infect Dis* 2006;59:192-4.
  51. Lee HK, Lee J. Group A *Streptococcus emm* gene types in pharyngeal isolates during 2009-2011 in Korea. *Health and Disease* 2012;5:58-63. Available at: [http://cdc.go.kr/CDC/cms/content/mobile/34/12734\\_view.html](http://cdc.go.kr/CDC/cms/content/mobile/34/12734_view.html). Accessed 25 December, 2017.
  52. Peyramond D, Portier H, Geslin P, Cohen R. 6-day amoxicillin versus 10-day penicillin V for group A beta-haemolytic streptococcal acute tonsillitis in adults: a French multicentre, open-label, randomized study. The French Study Group Clamorange. *Scand J Infect Dis* 1996;28:497-501.
  53. Cohen R, Levy C, Doit C, De La Rocque F, Boucherat M, Fitoussi F, Langue J, Bingen E. Six-day amoxicillin vs. ten-day penicillin V therapy for group A streptococcal tonsillopharyngitis. *Pediatr Infect Dis J* 1996;15:678-82.
  54. Curtin-Wirt C, Casey JR, Murray PC, Cleary CT, Hoeger WJ, Marsocci SM, Murphy ML, Francis AB, Pichichero ME. Efficacy of penicillin vs. amoxicillin in children with group A beta hemolytic streptococcal tonsillopharyngitis. *Clin Pediatr (Phila)* 2003;42:219-25.
  55. Lennon DR, Farrell E, Martin DR, Stewart JM. Once-daily amoxicillin versus twice-daily penicillin V in group A beta-haemolytic streptococcal pharyngitis. *Arch Dis Child* 2008;93:474-8.
  56. Clegg HW, Ryan AG, Dallas SD, Kaplan EL, Johnson DR, Norton HJ, Roddey OF, Martin ES, Swetenburg RL, Koonce EW, Felkner MM, Giftos PM. Treatment of streptococcal pharyngitis with once-daily compared with twice-daily amoxicillin: a noninferiority trial. *Pediatr Infect Dis J* 2006;25:761-7.
  57. Shvartzman P, Tabenkin H, Rosentzwaig A, Dolginov F. Treatment of streptococcal pharyngitis with amoxycillin once a day. *BMJ* 1993;306:1170-2.
  58. Feder HM Jr, Gerber MA, Randolph ME, Stelmach PS, Kaplan EL. Once-daily therapy for streptococcal pharyngitis

- with amoxicillin. *Pediatrics* 1999;103:47-51.
59. Andrews M, Condren M. Once-daily amoxicillin for pharyngitis. *J Pediatr Pharmacol Ther* 2010;15:244-8.
  60. Baltimore RS. Re-evaluation of antibiotic treatment of streptococcal pharyngitis. *Curr Opin Pediatr* 2010;22:77-82.
  61. Rimoin AW, Hoff NA, Fischer Walker CL, Hamza HS, Vince A, Abdel Rahman N, Andrasevic S, Emam S, Vukelic D, Elminawi N, Abdel Ghafar H, da Cunha AL, Qazi S, Gardovska D, Steinhoff MC. Treatment of streptococcal pharyngitis with once-daily amoxicillin versus intramuscular benzathine penicillin G in low-resource settings: a randomized controlled trial. *Clin Pediatr (Phila)* 2011;50:535-42.
  62. Eslami ST, Nassirian A, Nassirian H, Hatami E, Sobhani E, Najibpour R. Comparing performance of amoxicillin and intramuscular benzathine penicillin in relieving manifestations of streptococcal pharyngitis in children. *Ghana Med J* 2014;48:185-8.
  63. Matthys J. A primary antibiotic treatment for acute streptococcal tonsillitis? *Am J Med* 2009;122:e7; author reply e9.
  64. Patel NN, Patel DN. Acute exudative tonsillitis. *Am J Med* 2009;122:18-20.
  65. Brunton S, Pichichero M. Considerations in the use of antibiotics for streptococcal pharyngitis. *J Fam Pract* 2006;Suppl:S9-16.
  66. Armengol CE, Hendley JO. Occurrence of group A beta-hemolytic streptococcal pharyngitis in the four months after treatment of an index episode with amoxicillin once-daily or twice-daily or with cephalexin. *Pediatr Infect Dis J* 2012;31:1124-7.
  67. Kaplan EL, Johnson DR. Eradication of group A streptococci from the upper respiratory tract by amoxicillin with clavulanate after oral penicillin V treatment failure. *J Pediatr* 1988;113:400-3.
  68. Brook I. Treatment of patients with acute recurrent tonsillitis due to group A  $\beta$ -haemolytic streptococci: a prospective randomized study comparing penicillin and amoxicillin/clavulanate potassium. *J Antimicrob Chemother* 1989;24:227-33.
  69. Cherry JD. Pharyngitis (pharyngitis, tonsillitis, tonsillopharyngitis, and nasopharyngitis). In: Feigin RD, Cherry JD, Demmler GJ, Kaplan SL, eds. *Textbook of pediatric infectious diseases*. 5th ed. Philadelphia: WB Saunders; 2004;161-70.
  70. Riordan T. Human infection with *Fusobacterium necrophorum* (Necrobacillosis), with a focus on Lemierre's syndrome. *Clin Microbiol Rev* 2007;20:622-59.
  71. Flores AR, Caserta MT. Pharyngitis. In: Bennett JE, Dolin R, Tenover MC, Tenover FC, eds. *Mandell, Douglas, and Bennett's principles and practice of infectious diseases*. 8th ed. Philadelphia, PA: Elsevier; 2015;758.
  72. Holm SE. Reasons for failures in penicillin treatment of streptococcal tonsillitis and possible alternatives. *Pediatr Infect Dis J* 1994;13 (1 Suppl 1):S66-9; discussion S78-9.
  73. Lildholdt T, Doessing H, Lyster M, Outzen KE. The natural history of recurrent acute tonsillitis and a clinical trial of azithromycin for antibiotic prophylaxis. *Clin Otolaryngol Allied Sci* 2003;28:371-3.
  74. Hur JK. Upper respiratory infections in children. *J Korean Med Assoc* 2010;53:5-9.
  75. Esposito S, De Ritis G, D'Errico G, Noviello S, Ianniello F. Clinical comparison of cefaclor twice daily versus amoxicillin-clavulanate or erythromycin three times daily in the treatment of patients with streptococcal pharyngitis. *Clin Ther* 1998;20:72-9.
  76. Haczyński J, Bardadin J, Gryczyńska D, Gryczyński M, Gołabek W, Kawalski H, Kaźmierczak H, Krecicki T, Kubik P, Namysłowski G, Popiel L. A comparative study of cefaclor vs. amoxicillin/clavulanate in tonsillopharyngitis. *Med Sci Monit* 2001;7:1016-22.
  77. Esposito S, Marchisio P, Bosis S, Droghetti R, Mattina R, Principi N; Short Therapy Study Group. Comparative efficacy and safety of 5-day cefaclor and 10-day amoxicillin treatment of group A streptococcal pharyngitis in children. *Int J Antimicrob Agents* 2002;20:28-33.
  78. Ozaki T, Nishimura N, Suzuki M, Narita A, Watanabe N, Ahn J, Koyama N, Ushida H, Nakane K, Yasuda N, Funahashi K. Five-day oral cefditoren pivoxil versus 10-day oral amoxicillin for pediatric group A streptococcal pharyngotonsillitis. *J Infect Chemother* 2008;14:213-8.
  79. Aksit S, Caglayan S, Dokucu G. Seasonal benzathine penicillin G prophylaxis for recurrent streptococcal pharyngitis in children. *Acta Paediatr Jpn* 1998;40:256-8.
  80. Mora R, Salami A, Mora F, Cordone MP, Ottoboni S, Passali GC, Barbieri M. Efficacy of cefpodoxime in the prophylaxis of recurrent pharyngotonsillitis. *Int J Pediatr Otorhinolaryngol* 2003;67 (Suppl 1):S225-8.
  81. Ungkanont K, Yellon RF, Weissman JL, Casselbrant ML, González-Valdepeña H, Bluestone CD. Head and neck space infections in infants and children. *Otolaryngol Head Neck Surg* 1995;112:375-82.
  82. Larawin V, Naipao J, Dubey SP. Head and neck space infections. *Otolaryngol Head Neck Surg* 2006;135:889-93.
  83. Kilty SJ, Gaboury I. Clinical predictors of peritonsillar abscess in adults. *J Otolaryngol Head Neck Surg* 2008;37:165-8.
  84. Hsiao HJ, Huang YC, Hsia SH, Wu CT, Lin JJ. Clinical fea-



- tures of peritonsillar abscess in children. *Pediatr Neonatol* 2012;53:366-70.
85. Lepelletier D, Pinaud V, Le Conte P, Bourigault C, Asseray N, Ballereau F, Caillon J, Ferron C, Righini C, Batard E, Potel G; French PTA Study Group. Peritonsillar abscess (PTA): clinical characteristics, microbiology, drug exposures and outcomes of a large multicenter cohort survey of 412 patients hospitalized in 13 French university hospitals. *Eur J Clin Microbiol Infect Dis* 2016;35:867-73.
  86. Centor RM. Expand the pharyngitis paradigm for adolescents and young adults. *Ann Intern Med* 2009;151:812-5.
  87. Pham TT, Burchette JL Jr, Hale LP. Fatal disseminated adenovirus infections in immunocompromised patients. *Am J Clin Pathol* 2003;120:575-83.
  88. Bonnet F, Neau D, Viillard JF, Morlat P, Ragnaud JM, Dupon M, Legendre P, Imbert Y, Lifermann F, Le Bras M, Beylot J, Longy-Boursier M. Clinical and laboratory findings of cytomegalovirus infection in 115 hospitalized non-immunocompromised adults. *Ann Med Interne (Paris)* 2001;152:227-35.
  89. Korea Centers for Disease Prevention and Control (KCDC). Guideline for antibiotic use in children with acute upper respiratory infection, 2016. Available at: [http://www.cdc.go.kr/CDC/together/CdcKrTogether0302.jsp?menuIds=HOME001-MNU1154-MNU0005-MNU0088&fid=51&q\\_type=&q\\_value=&cid=71756&page-Num=1](http://www.cdc.go.kr/CDC/together/CdcKrTogether0302.jsp?menuIds=HOME001-MNU1154-MNU0005-MNU0088&fid=51&q_type=&q_value=&cid=71756&page-Num=1). Accessed 25 December, 2017.
  90. Snow V, Mottur-Pilson C, Cooper RJ, Hoffman JR; American Academy of Family Physicians; American College of Physicians-American Society of Internal Medicine; Centers for Disease Control. Principles of appropriate antibiotic use for acute pharyngitis in adults. *Ann Intern Med* 2001;134:506-8.
  91. Shulman ST, Gerber MA. So what's wrong with penicillin for strep throat? *Pediatrics* 2004;113:1816-9.
  92. Choby BA. Diagnosis and treatment of streptococcal pharyngitis. *Am Fam Physician* 2009;79:383-90.
  93. Tan T, Little P, Stokes T; Guideline Development Group. Antibiotic prescribing for self limiting respiratory tract infections in primary care: summary of NICE guidance. *BMJ* 2008;337:a437.
  94. Rosenfeld RM, Piccirillo JF, Chandrasekhar SS, Brook I, Ashok Kumar K, Kramper M, Orlandi RR, Palmer JN, Patel ZM, Peters A, Walsh SA, Corrigan MD. Clinical practice guideline (update): adult sinusitis. *Otolaryngol Head Neck Surg* 2015;152 (2 Suppl):S1-39.
  95. Rosenfeld RM. Acute sinusitis in adults. *N Engl J Med* 2016;375:962-70.
  96. Rosenfeld RM, Andes D, Bhattacharyya N, Cheung D, Eisenberg S, Ganiats TG, Gelzer A, Hamilos D, Haydon RC 3rd, Hudgins PA, Jones S, Krouse HJ, Lee LH, Mahoney MC, Marple BF, Mitchell CJ, Nathan R, Shiffman RN, Smith TL, Witsell DL. Clinical practice guideline: adult sinusitis. *Otolaryngol Head Neck Surg* 2007;137 (3 Suppl):S1-31.
  97. Masood A, Moumoulidis I, Panesar J. Acute rhinosinusitis in adults: an update on current management. *Postgrad Med J* 2007;83:402-8.
  98. Koh YI. Diagnosis of allergic rhinitis. *Korean J Med* 2013;85:452-6.
  99. Gwaltney JM Jr. Acute community-acquired sinusitis. *Clin Infect Dis* 1996;23:1209-23; quiz 1224-5.
  100. Puhakka T, Mäkelä MJ, Alanen A, Kallio T, Korsoff L, Arstila P, Leinonen M, Pulkkinen M, Suonpää J, Mertsola J, Ruuskanen O. Sinusitis in the common cold. *J Allergy Clin Immunol* 1998;102:403-8.
  101. Berg O, Carenfelt C, Rystedt G, Anggård A. Occurrence of asymptomatic sinusitis in common cold and other acute ENT-infections. *Rhinology* 1986;24:223-5.
  102. Gwaltney JM Jr, Scheld WM, Sande MA, Sydnor A. The microbial etiology and antimicrobial therapy of adults with acute community-acquired sinusitis: a fifteen-year experience at the University of Virginia and review of other selected studies. *J Allergy Clin Immunol* 1992;90:457-61; discussion 462.
  103. Sokol W. Epidemiology of sinusitis in the primary care setting: results from the 1999-2000 respiratory surveillance program. *Am J Med* 2001;111 (Suppl 9A):19S-24S.
  104. Burgstaller JM, Steurer J, Holzmann D, Geiges G, Soyka MB. Antibiotic efficacy in patients with a moderate probability of acute rhinosinusitis: a systematic review. *Eur Arch Otorhinolaryngol* 2016;273:1067-77.
  105. Gwaltney JM Jr. Acute community acquired bacterial sinusitis: To treat or not to treat. *Can Respir J* 1999;6 (Suppl A):46A-50A.
  106. Gwaltney JM Jr, Wiesinger BA, Patrie JT. Acute community-acquired bacterial sinusitis: the value of antimicrobial treatment and the natural history. *Clin Infect Dis* 2004;38: 227-33.
  107. Ioannidis JP, Lau J. Technical report: evidence for the diagnosis and treatment of acute uncomplicated sinusitis in children: a systematic overview. *Pediatrics* 2001;108:E57.
  108. Chow AW, Benninger MS, Brook I, Brozek JL, Goldstein EJ, Hicks LA, Pankey GA, Seleznick M, Volturo G, Wald

- ER, File TM Jr; Infectious Diseases Society of America. IDSA clinical practice guideline for acute bacterial rhinosinusitis in children and adults. *Clin Infect Dis* 2012;54:e72-112.
109. Williams JW Jr, Aguilar C, Cornell J, Chiquette ED, Makela M, Holleman DR, Simel DL. Antibiotics for acute maxillary sinusitis. *Cochrane Database Syst Rev* 2003;CD000243.
  110. Ip S, Fu L, Balk E, Chew P, Devine D, Lau J. Update on acute bacterial rhinosinusitis. *Evid Rep Technol Assess (Summ)* 2005;(124):1-3.
  111. Anon JB, Jacobs MR, Poole MD, Ambrose PG, Benninger MS, Hadley JA, Craig WA; Sinus And Allergy Health Partnership. Antimicrobial treatment guidelines for acute bacterial rhinosinusitis. *Otolaryngol Head Neck Surg* 2004;130:1-45.
  112. American Academy of Pediatrics. Subcommittee on Management of Sinusitis and Committee on Quality Improvement. Clinical practice guideline: management of sinusitis. *Pediatrics* 2001;108:798-808.
  113. Hickner JM, Bartlett JG, Besser RE, Gonzales R, Hoffman JR, Sande MA; American Academy of Family Physicians; American College of Physicians-American Society of Internal Medicine; Centers for Disease Control; Infectious Diseases Society of America. Principles of appropriate antibiotic use for acute rhinosinusitis in adults: background. *Ann Intern Med* 2001;134:498-505.
  114. Benninger MS, Sedory Holzer SE, Lau J. Diagnosis and treatment of uncomplicated acute bacterial rhinosinusitis: summary of the Agency for Health Care Policy and Research evidence-based report. *Otolaryngol Head Neck Surg* 2000;122:1-7.
  115. Hadley JA, Mösges R, Desrosiers M, Haverstock D, van Veenhuyzen D, Herman-Gnjidic Z. Moxifloxacin five-day therapy versus placebo in acute bacterial rhinosinusitis. *Laryngoscope* 2010;120:1057-62.
  116. Ahovuo-Saloranta A, Rautakorpi UM, Borisenko OV, Liira H, Williams JW Jr, Mäkelä M. Antibiotics for acute maxillary sinusitis in adults. *Cochrane Database Syst Rev* 2014;(2):CD000243.
  117. Henry DC, Riffer E, Sokol WN, Chaudry NI, Swanson RN. Randomized double-blind study comparing 3- and 6-day regimens of azithromycin with a 10-day amoxicillin-clavulanate regimen for treatment of acute bacterial sinusitis. *Antimicrob Agents Chemother* 2003;47:2770-4.
  118. Luterman M, Tellier G, Lasko B, Leroy B. Efficacy and tolerability of telithromycin for 5 or 10 days vs amoxicillin/clavulanic acid for 10 days in acute maxillary sinusitis. *Ear Nose Throat J* 2003;82:576-80, 82-74, 586 passim.
  119. Low DE, Desrosiers M, McSherry J, Garber G, Williams JW Jr, Remy H, Fenton RS, Forte V, Balter M, Rotstein C, Craft C, Dubois J, Harding G, Schloss M, Miller M, McIvor RA, Davidson RJ. A practical guide for the diagnosis and treatment of acute sinusitis. *CMAJ* 1997;156 (Suppl 6):S1-14.
  120. Berg O, Carenfelt C. Analysis of symptoms and clinical signs in the maxillary sinus empyema. *Acta Otolaryngol* 1988;105:343-9.
  121. Jenkins SG, Farrell DJ, Patel M, Lavin BS. Trends in anti-bacterial resistance among *Streptococcus pneumoniae* isolated in the USA, 2000-2003: PROTEKT US years 1-3. *J Infect* 2005;51:355-63.
  122. Falagas ME, Karageorgopoulos DE, Grammatikos AP, Matthaïou DK. Effectiveness and safety of short vs. long duration of antibiotic therapy for acute bacterial sinusitis: a meta-analysis of randomized trials. *Br J Clin Pharmacol* 2009;67:161-71.
  123. Lemiengre MB, van Driel ML, Merenstein D, Young J, De Sutter AI. Antibiotics for clinically diagnosed acute rhinosinusitis in adults. *Cochrane Database Syst Rev* 2012;10:CD006089.
  124. Jacobs MR. Antimicrobial-resistant *Streptococcus pneumoniae*: trends and management. *Expert Rev Anti Infect Ther* 2008;6:619-35.
  125. Lynch JP 3rd, Zhanel GG. *Streptococcus pneumoniae*: epidemiology and risk factors, evolution of antimicrobial resistance, and impact of vaccines. *Curr Opin Pulm Med* 2010;16:217-25.
  126. Karageorgopoulos DE, Giannopoulou KP, Grammatikos AP, Dimopoulos G, Falagas ME. Fluoroquinolones compared with beta-lactam antibiotics for the treatment of acute bacterial sinusitis: a meta-analysis of randomized controlled trials. *CMAJ* 2008;178:845-54.
  127. Harrison CJ, Woods C, Stout G, Martin B, Selvarangan R. Susceptibilities of *Haemophilus influenzae*, *Streptococcus pneumoniae*, including serotype 19A, and *Moraxella catarrhalis* paediatric isolates from 2005 to 2007 to commonly used antibiotics. *J Antimicrob Chemother* 2009;63:511-9.
  128. Desrosiers M, Evans GA, Keith PK, Wright ED, Kaplan A, Bouchard J, Ciavarella A, Doyle PW, Javer AR, Leith ES, Mukherji A, Robert Schellenberg R, Small P, Witterick IJ. Canadian clinical practice guidelines for acute and chronic rhinosinusitis. *J Otolaryngol Head Neck Surg* 2011;40 (Suppl 2):S99-193.
  129. Wald ER. Sinusitis. *Pediatr Ann* 1998;27:811-8.

130. Fenoll A, Giménez MJ, Robledo O, Aguilar L, Tarragó D, Granizo JJ, Gimeno M, Coronel P. In vitro activity of oral cephalosporins against pediatric isolates of *Streptococcus pneumoniae* non-susceptible to penicillin, amoxicillin or erythromycin. *J Chemother* 2008;20:175-9.
131. Fenoll A, Giménez MJ, Robledo O, Aguilar L, Tarragó D, Granizo JJ, Martín-Herrero JE. Influence of penicillin/amoxicillin non-susceptibility on the activity of third-generation cephalosporins against *Streptococcus pneumoniae*. *Eur J Clin Microbiol Infect Dis* 2008;27:75-80.
132. Sader HS, Jacobs MR, Fritsche TR. Review of the spectrum and potency of orally administered cephalosporins and amoxicillin/clavulanate. *Diagn Microbiol Infect Dis* 2007;57 (3 Suppl):5S-12S.
133. Jansen WT, Verel A, Beitsma M, Verhoef J, Milatovic D. Surveillance study of the susceptibility of *Haemophilus influenzae* to various antibacterial agents in Europe and Canada. *Curr Med Res Opin* 2008;24:2853-61.
134. Fenoll A, Aguilar L, Robledo O, Giménez MJ, Tarragó D, Granizo JJ, Gimeno M, Coronel P. Influence of the beta-lactam resistance phenotype on the cefuroxime versus cefditoren susceptibility of *Streptococcus pneumoniae* and *Haemophilus influenzae* recovered from children with acute otitis media. *J Antimicrob Chemother* 2007;60:323-7.
135. Poachanukoon O, Kitcharoensakkul M. Efficacy of cefditoren pivoxil and amoxicillin/clavulanate in the treatment of pediatric patients with acute bacterial rhinosinusitis in Thailand: a randomized, investigator-blinded, controlled trial. *Clin Ther* 2008;30:1870-9.
136. Kim SH, Bae IK, Park D, Lee K, Kim NY, Song SA, Kim HR, Jeon GW, Urm SH, Shin JH. Serotype distribution and antimicrobial resistance of *Streptococcus pneumoniae* isolates causing invasive and noninvasive pneumococcal diseases in Korea from 2008 to 2014. *Biomed Res Int* 2016;2016:6950482.
137. Han SB, Kim JH, Kang JH, Ma SH, Kim CS, Kim KH, Kim HM, Choi YY. Recent epidemiology of *Streptococcus pneumoniae* in nasopharynxes of Korean children with acute otitis media. *J Infect Chemother* 2017;23:136-41.
138. Gidengil CA, Kruskal BA, Lee GM. Initial antibiotic choice in the treatment of group A streptococcal pharyngitis and return visit rates. *J Pediatric Infect Dis Soc* 2013;2:361-7.
139. Blackburn RM, Henderson KL, Lillie M, Sheridan E, George RC, Deas AH, Johnson AP. Empirical treatment of influenza-associated pneumonia in primary care: a descriptive study of the antimicrobial susceptibility of lower respiratory tract bacteria (England, Wales and Northern Ireland, January 2007-March 2010). *Thorax* 2011;66:389-95.
140. Zhanel GG, Palatnick L, Nichol KA, Bellyou T, Low DE, Hoban DJ. Antimicrobial resistance in respiratory tract *Streptococcus pneumoniae* isolates: results of the Canadian Respiratory Organism Susceptibility Study, 1997 to 2002. *Antimicrob Agents Chemother* 2003;47:1867-74.
141. Zhanel GG, Palatnick L, Nichol KA, Low DE, Hoban DJ; CROSS Study Group. Antimicrobial resistance in *Haemophilus influenzae* and *Moraxella catarrhalis* respiratory tract isolates: results of the Canadian Respiratory Organism Susceptibility Study, 1997 to 2002. *Antimicrob Agents Chemother* 2003;47:1875-81.
142. Ludlam HA, Enoch DA. Doxycycline or moxifloxacin for the management of community-acquired pneumonia in the UK? *Int J Antimicrob Agents* 2008;32:101-5.
143. Mokabberi R, Haftbaradaran A, Ravakhah K. Doxycycline vs. levofloxacin in the treatment of community-acquired pneumonia. *J Clin Pharm Ther* 2010;35:195-200.
144. Peck KR. Appropriate use of antibiotics for the treatment of acute upper respiratory tract infections in adults. *J Korean Med Assoc* 2006;49:553-8.
145. Brook I. Acute and chronic bacterial sinusitis. *Infect Dis Clin North Am* 2007;21:427-48, vii.
146. Lanza DC, Kennedy DW. Adult rhinosinusitis defined. *Otolaryngol Head Neck Surg* 1997;117:S1-7.
147. Leung R, Almassian S, Kern R, Conley D, Tan B, Chandra R. Patient level decision making in recurrent acute rhinosinusitis: a cost-benefit threshold for surgery. *Laryngoscope* 2013;123:11-6.
148. Wilson KF, McMains KC, Orlandi RR. The association between allergy and chronic rhinosinusitis with and without nasal polyps: an evidence-based review with recommendations. *Int Forum Allergy Rhinol* 2014;4:93-103.
149. Slavin RG, Spector SL, Bernstein IL, Kaliner MA, Kennedy DW, Virant FS, Wald ER, Khan DA, Blessing-Moore J, Lang DM, Nicklas RA, Oppenheimer JJ, Portnoy JM, Schuller DE, Tilles SA, Borish L, Nathan RA, Smart BA, Vandewalker ML; American Academy of Allergy, Asthma and Immunology; American College of Allergy, Asthma and Immunology; Joint Council of Allergy, Asthma and Immunology. The diagnosis and management of sinusitis: a practice parameter update. *J Allergy Clin Immunol* 2005;116 (6 Suppl):S13-47.
150. Fokkens WJ, Lund VJ, Mullol J, Bachert C, Alobid I, Baroody F, Cohen N, Cervin A, Douglas R, Gevaert P, Geor-

- galas C, Goossens H, Harvey R, Hellings P, Hopkins C, Jones N, Joos G, Kalogjera L, Kern B, Kowalski M, Price D, Riechelmann H, Schlosser R, Senior B, Thomas M, Toskala E, Voegels R, Wang de Y, Wormald PJ. European position paper on rhinosinusitis and nasal polyps 2012. *Rhinol Suppl* 2012;3 p preceding table of contents, 1-298.
151. Stachler RJ. Comorbidities of asthma and the unified airway. *Int Forum Allergy Rhinol* 2015;5 (Suppl 1):S17-22.
152. Stevens WW, Peters AT. Immunodeficiency in chronic sinusitis: recognition and treatment. *Am J Rhinol Allergy* 2015;29:115-8.
153. Younis RT, Lazar RH, Anand VK. Intracranial complications of sinusitis: a 15-year review of 39 cases. *Ear Nose Throat J* 2002;81:636-8, 640-2, 644.
154. Peters AT, Spector S, Hsu J, Hamilos DL, Baroody FM, Chandra RK, Grammer LC, Kennedy DW, Cohen NA, Kalliner MA, Wald ER, Karagianis A, Slavin RG; Joint Task Force on Practice Parameters, representing the American Academy of Allergy, Asthma and Immunology, the American College of Allergy, Asthma and Immunology, and the Joint Council of Allergy, Asthma and Immunology. Diagnosis and management of rhinosinusitis: a practice parameter update. *Ann Allergy Asthma Immunol* 2014;113:347-85.
155. Gallagher RM, Gross CW, Phillips CD. Suppurative intracranial complications of sinusitis. *Laryngoscope* 1998; 108:1635-42.
156. American Academy of Pediatrics. Subcommittee on Management of Sinusitis and Committee on Quality Improvement. Clinical practice guideline: management of sinusitis. *Pediatrics* 2001;108:798-808.



## 부 록

### 체계적인 문헌 검색 과정: 데이터베이스에 대한 검색식 및 문헌 검색 결과

| 데이터베이스명                  | 검색식                                                                                                                                                                                                                                                                                                                                                                                                                                                                                                                                       | 검색식 결과  | 중복 제거 | 주제 관련 논문 |
|--------------------------|-------------------------------------------------------------------------------------------------------------------------------------------------------------------------------------------------------------------------------------------------------------------------------------------------------------------------------------------------------------------------------------------------------------------------------------------------------------------------------------------------------------------------------------------|---------|-------|----------|
| Pubmed<br>(Ovid medline) | 1. Exp pharyngitis                                                                                                                                                                                                                                                                                                                                                                                                                                                                                                                        | 14,829  | 571   | 259      |
|                          | 2. Exp sinusitis                                                                                                                                                                                                                                                                                                                                                                                                                                                                                                                          | 18,882  |       |          |
|                          | 3. (pharyngotonsilliti* OR tonsilliti* OR pharyngiti* OR nasopharyngiti* OR tonsillopharyngiti* OR sore throat OR sore throats).tw.                                                                                                                                                                                                                                                                                                                                                                                                       | 12,866  |       |          |
|                          | 4. (sinusiti* OR rhinosinusiti*).tw.                                                                                                                                                                                                                                                                                                                                                                                                                                                                                                      | 17,728  |       |          |
|                          | 5. (upper adj (lung OR pulmonary OR respiratory) adj2 (inflammat* OR infecti*)).tw.                                                                                                                                                                                                                                                                                                                                                                                                                                                       | 6,596   |       |          |
|                          | 6. OR/1-5                                                                                                                                                                                                                                                                                                                                                                                                                                                                                                                                 | 48,806  |       |          |
|                          | 7. (Antibioti* OR antimicrob*).ti.                                                                                                                                                                                                                                                                                                                                                                                                                                                                                                        | 119,270 |       |          |
|                          | 8. 6 and 7                                                                                                                                                                                                                                                                                                                                                                                                                                                                                                                                | 1,789   |       |          |
|                          | 9. Limit 8 to (English language and humans and yr="2006-Current")                                                                                                                                                                                                                                                                                                                                                                                                                                                                         | 592     |       |          |
| EMBASE                   | 1. 'Pharyngitis'/exp OR 'tonsillitis'/exp OR 'sore throat'/exp                                                                                                                                                                                                                                                                                                                                                                                                                                                                            | 45,512  | 854   | 116      |
|                          | 2. 'Sinusitis'/exp OR 'rhinosinusitis'/exp                                                                                                                                                                                                                                                                                                                                                                                                                                                                                                | 37,725  |       |          |
|                          | 3. Pharyngotonsilliti*:ti,ab,de OR tonsilliti*:ti,ab,de OR pharyngiti*:ti,ab,de OR nasopharyngiti*:ti,ab,de OR tonsillopharyngiti*:ti,ab,de OR 'sore throat':ti,ab,de OR 'sore throats':ti,ab,de                                                                                                                                                                                                                                                                                                                                          | 40,942  |       |          |
|                          | 4. Sinusiti*:ti,ab,de OR rhinosinusiti*:ti,ab,de                                                                                                                                                                                                                                                                                                                                                                                                                                                                                          |         |       |          |
|                          | 5. (upper NEAR/2 (lung OR pulmonary OR respiratory)):ti,ab,de AND (inflammat*:ti,ab,de OR infecti*:ti,ab,de)                                                                                                                                                                                                                                                                                                                                                                                                                              | 32,985  |       |          |
|                          | 6. #1 OR #2 OR #3 OR #4 OR #5                                                                                                                                                                                                                                                                                                                                                                                                                                                                                                             | 111,233 |       |          |
|                          | 7. Antibiotic*:ti or antimicrobial*:ti                                                                                                                                                                                                                                                                                                                                                                                                                                                                                                    | 164,524 |       |          |
|                          | 8. #6 AND #7                                                                                                                                                                                                                                                                                                                                                                                                                                                                                                                              | 3,486   |       |          |
|                          | 9. #6 AND #7 AND [english]/lim AND [humans]/lim AND [2006-2017]/py                                                                                                                                                                                                                                                                                                                                                                                                                                                                        | 1,396   |       |          |
| KMbase                   | ((((([ABSTRACT=pharyngiti*] OR [ABSTRACT=nasopharyngiti*] OR [ABSTRACT=tonsillopharyngiti*] OR [ABSTRACT=sinusiti*] OR [ABSTRACT=rhinosinusiti*] OR ((([ABSTRACT=pharyngotonsilliti*] OR [ABSTRACT=tonsilliti*] OR [ABSTRACT=sore throat] OR [ABSTRACT=sore throats] OR (((([ABSTRACT=인두편도염] OR [ABSTRACT=인두염] OR [ABSTRACT=편도염] OR [ABSTRACT=후두염] OR [ABSTRACT=인후두염] OR [ABSTRACT=부비동염] OR [ABSTRACT=상기도감염] OR [ABSTRACT=상기도 감염]) AND ([TITLE=guideline*] OR [TITLE=recommendation*] OR [TITLE=가이드라인] OR [TITLE=지침] OR [TITLE=권고]))))))) | 693     | 690   | 27       |
| KoreaMed                 | 1. (pharyngotonsilliti* OR tonsilliti* OR pharyngiti* OR nasopharyngiti* OR tonsillopharyngiti* OR "sore throat" OR "sore throats" OR sinusiti* OR rhinosinusiti*) AND (guideline* OR recommendation*)                                                                                                                                                                                                                                                                                                                                    | 2       | 2     | 2        |
|                          | 2. Limit 1 to English, Korean, Humans, Publication Date from 2006 to 2017                                                                                                                                                                                                                                                                                                                                                                                                                                                                 |         |       |          |
