# Supplementary material for: Guidelines for the Antibiotic Use in Adults with Acute Upper Respiratory Tract Infections
Source: PubMed Central journal article supplement — Infect Chemother. 2017 Dec 26;49(4):326–52. doi: 10.3947/ic.2017.49.4.326 (PMC5754344; doi:10.3947/ic.2017.49.4.326), 2017-12-26
Supplement: ic-49-326-s002.pdf [file ic-49-326-s002.pdf]

**Supplementary Table 1.** Systematic literature search process: Database search and results

| Database              | Search formula                                                                                                                                                                                                                                                                                                                                                                                                                                                                                                   | Results | Exclusion of redundant articles | Topic-related articles |
|-----------------------|------------------------------------------------------------------------------------------------------------------------------------------------------------------------------------------------------------------------------------------------------------------------------------------------------------------------------------------------------------------------------------------------------------------------------------------------------------------------------------------------------------------|---------|---------------------------------|------------------------|
| Pubmed (ovid medline) | 1. Exp pharyngitis                                                                                                                                                                                                                                                                                                                                                                                                                                                                                               | 14,829  | 571                             | 259                    |
|                       | 2. Exp sinusitis                                                                                                                                                                                                                                                                                                                                                                                                                                                                                                 | 18,882  |                                 |                        |
|                       | 3. (pharyngotonsilliti* OR tonsilliti* OR pharyngiti* OR nasopharyngiti* OR tonsillopharyngiti* OR sore throat OR sore throats).tw.                                                                                                                                                                                                                                                                                                                                                                              | 12,866  |                                 |                        |
|                       | 4. (sinusiti* OR rhinosinusiti*).tw.                                                                                                                                                                                                                                                                                                                                                                                                                                                                             | 17,728  |                                 |                        |
|                       | 5. (upper adj (lung OR pulmonary OR respiratory) adj2 (inflammat* OR infecti*)).tw.                                                                                                                                                                                                                                                                                                                                                                                                                              | 6,596   |                                 |                        |
|                       | 6. OR/1-5                                                                                                                                                                                                                                                                                                                                                                                                                                                                                                        | 48,806  |                                 |                        |
|                       | 7. (Antibioti* OR antimicrob*).ti.                                                                                                                                                                                                                                                                                                                                                                                                                                                                               | 119,270 |                                 |                        |
|                       | 8. 6 and 7                                                                                                                                                                                                                                                                                                                                                                                                                                                                                                       | 1,789   |                                 |                        |
|                       | 9. Limit 8 to (English language and humans and yr="2006-Current")                                                                                                                                                                                                                                                                                                                                                                                                                                                | 592     |                                 |                        |
| EMBASE                | 1. 'Pharyngitis'/exp OR 'tonsillitis'/exp OR 'sore throat'/exp                                                                                                                                                                                                                                                                                                                                                                                                                                                   | 45,512  | 854                             | 116                    |
|                       | 2. 'sinusitis'/exp OR 'rhinosinusitis'/exp                                                                                                                                                                                                                                                                                                                                                                                                                                                                       | 37,725  |                                 |                        |
|                       | 3. Pharyngotonsilliti*:ti,ab,de OR tonsilliti*:ti,ab,de OR pharyngiti*:ti,ab,de OR nasopharyngiti*:ti,ab,de OR tonsillopharyngiti*:ti,ab,de OR 'sore throat':ti,ab,de OR 'sore throats':ti,ab,de                                                                                                                                                                                                                                                                                                                 | 40,942  |                                 |                        |
|                       | 4. Sinusiti*:ti,ab,de OR rhinosinusiti*:ti,ab,de                                                                                                                                                                                                                                                                                                                                                                                                                                                                 |         |                                 |                        |
|                       | 5. (upper NEAR/2 (lung OR pulmonary OR respiratory)):ti,ab,de AND (inflammat*:ti,ab,de OR infecti*:ti,ab,de)                                                                                                                                                                                                                                                                                                                                                                                                     | 32,985  |                                 |                        |
|                       | 6. #1 OR #2 OR #3 OR #4 OR #5                                                                                                                                                                                                                                                                                                                                                                                                                                                                                    | 111,233 |                                 |                        |
|                       | 7. Antibiotic*:ti or antimicrobial*:ti                                                                                                                                                                                                                                                                                                                                                                                                                                                                           | 164,524 |                                 |                        |
|                       | 8. #6 AND #7                                                                                                                                                                                                                                                                                                                                                                                                                                                                                                     | 3,486   |                                 |                        |
|                       | 9. #6 AND #7 AND [english]/lim AND [humans]/lim AND [2006-2017]/py                                                                                                                                                                                                                                                                                                                                                                                                                                               | 1,396   |                                 |                        |
| KMbase                | (((((ABSTRACT=pharyngiti* OR ABSTRACT=nasopharyngiti*) OR ABSTRACT=tonsillopharyngiti*) OR ABSTRACT=sinusiti*) OR ABSTRACT=rhinosinusiti*) OR (((ABSTRACT=pharyngotonsilliti*) OR ABSTRACT=tonsilliti*) OR ABSTRACT=sore throat) OR ABSTRACT=sore throats) OR ((((((ABSTRACT=인두편도염) OR ABSTRACT=인두염) OR ABSTRACT=편도염) OR ABSTRACT=후두염) OR ABSTRACT=인후두염) OR ABSTRACT=부비동염) OR ABSTRACT=상기도감염) OR ABSTRACT=상기도 감염) AND ((TITLE=guideline*) OR TITLE=recommendation*) OR TITLE=가이드라인) OR TITLE=지침) OR TITLE=권고)))) | 693     | 690                             | 27                     |
| KoreaMed              | 1. (pharyngotonsilliti* OR tonsilliti* OR pharyngiti* OR nasopharyngiti* OR tonsillopharyngiti* OR "sore throat" OR "sore throats" OR sinusiti* OR rhinosinusiti*) AND (guideline* OR recommendation*)                                                                                                                                                                                                                                                                                                           | 2       | 2                               | 2                      |
|                       | 2. Limit 1 to English, Korean, Humans, Publication Date from 2006 to 2017                                                                                                                                                                                                                                                                                                                                                                                                                                        |         |                                 |                        |
